# Supplementary material for: Planar triazinium cations from vanadyl-mediated ring cyclizations: the thiazole species for efficient nuclear staining and photocytotoxicity
Source: Royal Society of Chemistry journal article supplement (doi:10.1039/c2dt32810k), 2013-01-01
Supplement: c2dt32810k.pdf [file c2dt32810k.pdf]

## **Planar triazinium cations from vanadyl-mediated ring cyclizations: the thiazole species for efficient nuclear staining and photocy- toxicity**

**Puja Prasad,<sup>a</sup> Imran Khan,<sup>b</sup> Pijus K. Sasmal,<sup>a</sup> Debasis Koley,<sup>c</sup> Paturu Kondaiah,<sup>\*b</sup> and Akhil R. Chakravarty<sup>\*a</sup>**

<sup>a</sup>*Department of Inorganic and Physical Chemistry, Indian Institute of Science, Bangalore 560012,*

*India. Fax: (+91)80-23600683; Tel: +91-80-22932533; E-mail: arc@ipc.iisc.ernet.in*

<sup>b</sup>*Department of Molecular Reproduction, Development and Genetics, Indian Institute of Science, Bangalore 560012, India.*

Electronic Supplementary Information (ESI†)

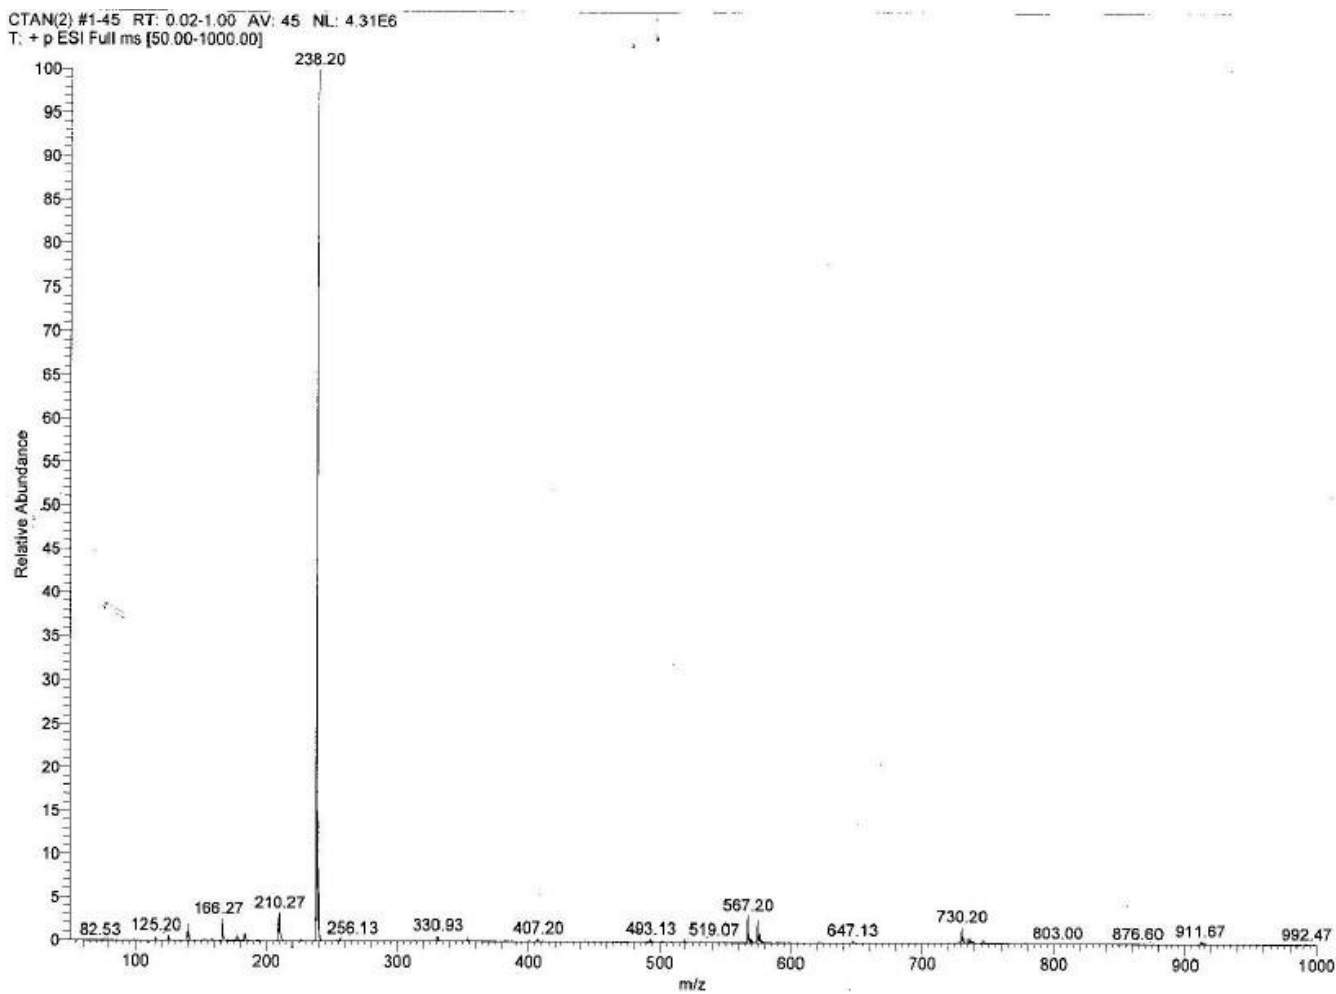

**ESI Fig. S1.** The ESI-MS spectrum of compound **1** showing the molecular ion peak at 238.20 (m/z) in CH<sub>3</sub>CN.

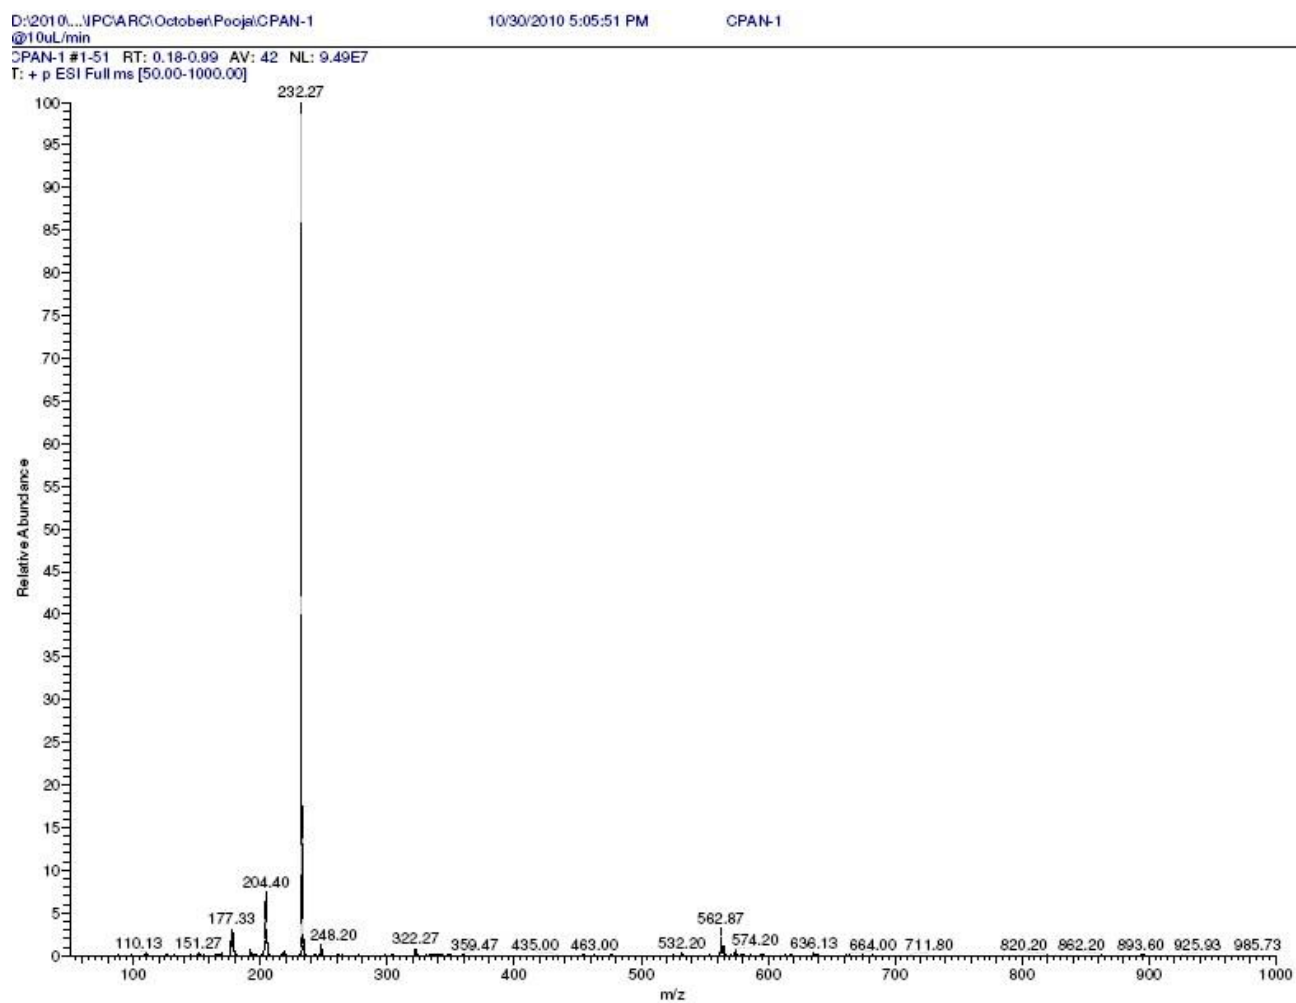

**ESI Fig. S2.** The ESI-MS spectrum of compound **2** showing the molecular ion peak at 232.27 (m/z) in CH<sub>3</sub>CN.

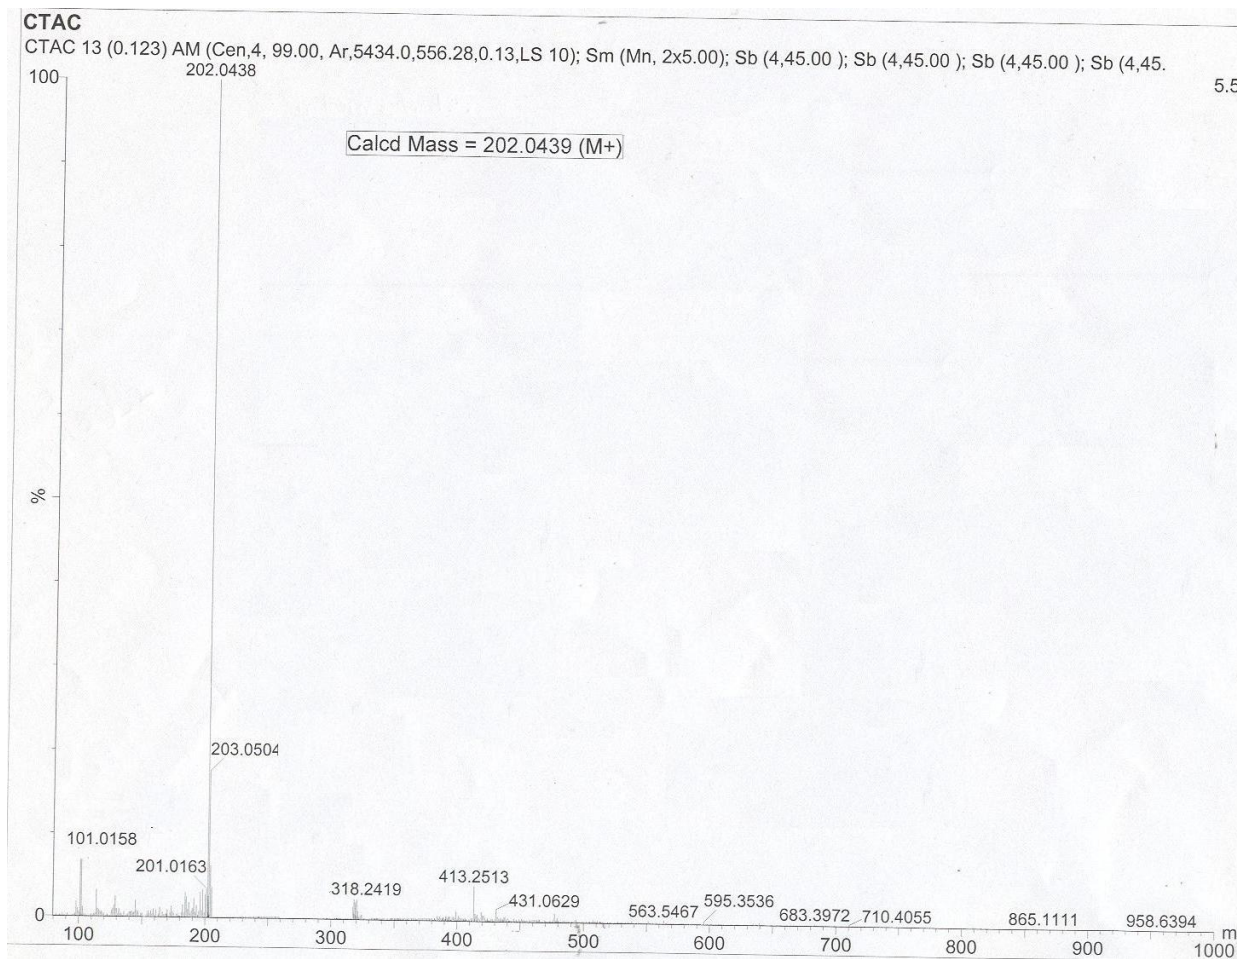

**ESI Fig. S3.** The ESI-MS spectrum of compound **3** showing the molecular ion peak at 202.04 (m/z) in CH<sub>3</sub>CN.

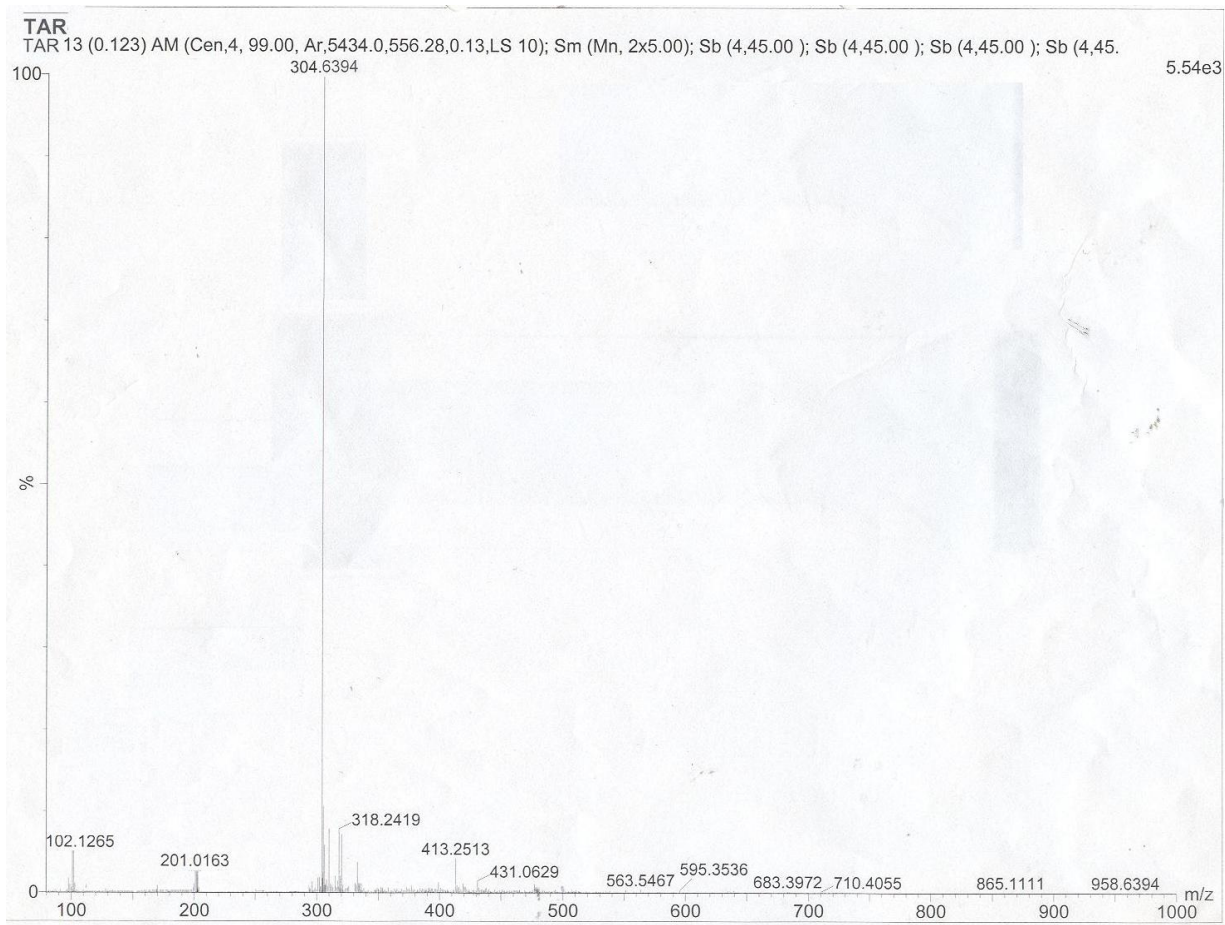

**ESI Fig. S4.** The ESI-MS spectrum of complex **4** showing the molecular ion peak at (m/z) in 304.63 in MeOH:H<sub>2</sub>O (1:1).

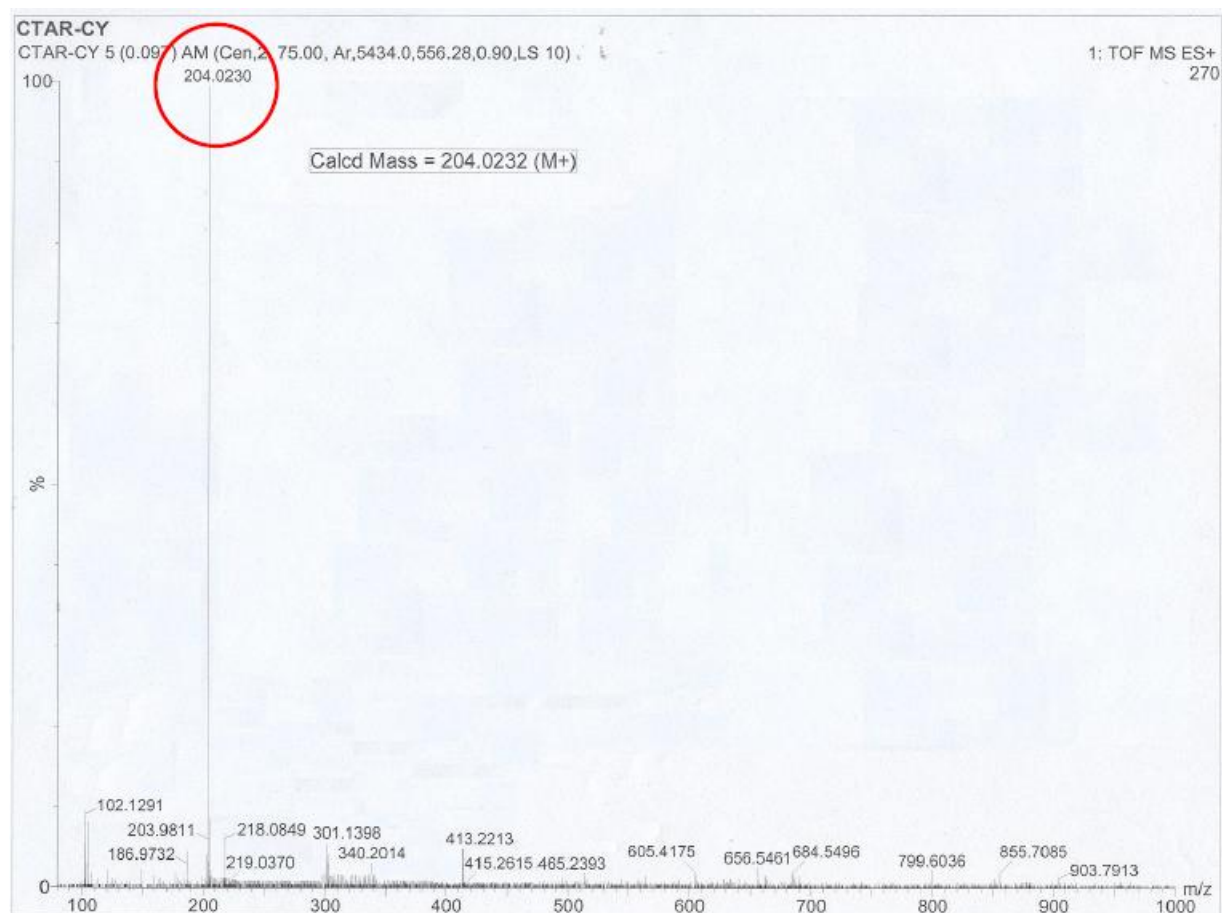

**ESI Fig. S5.** The ESI-MS spectrum of compound **5** showing the molecular ion peak at (m/z) in 204.02 in MeOH:H<sub>2</sub>O (1:1).

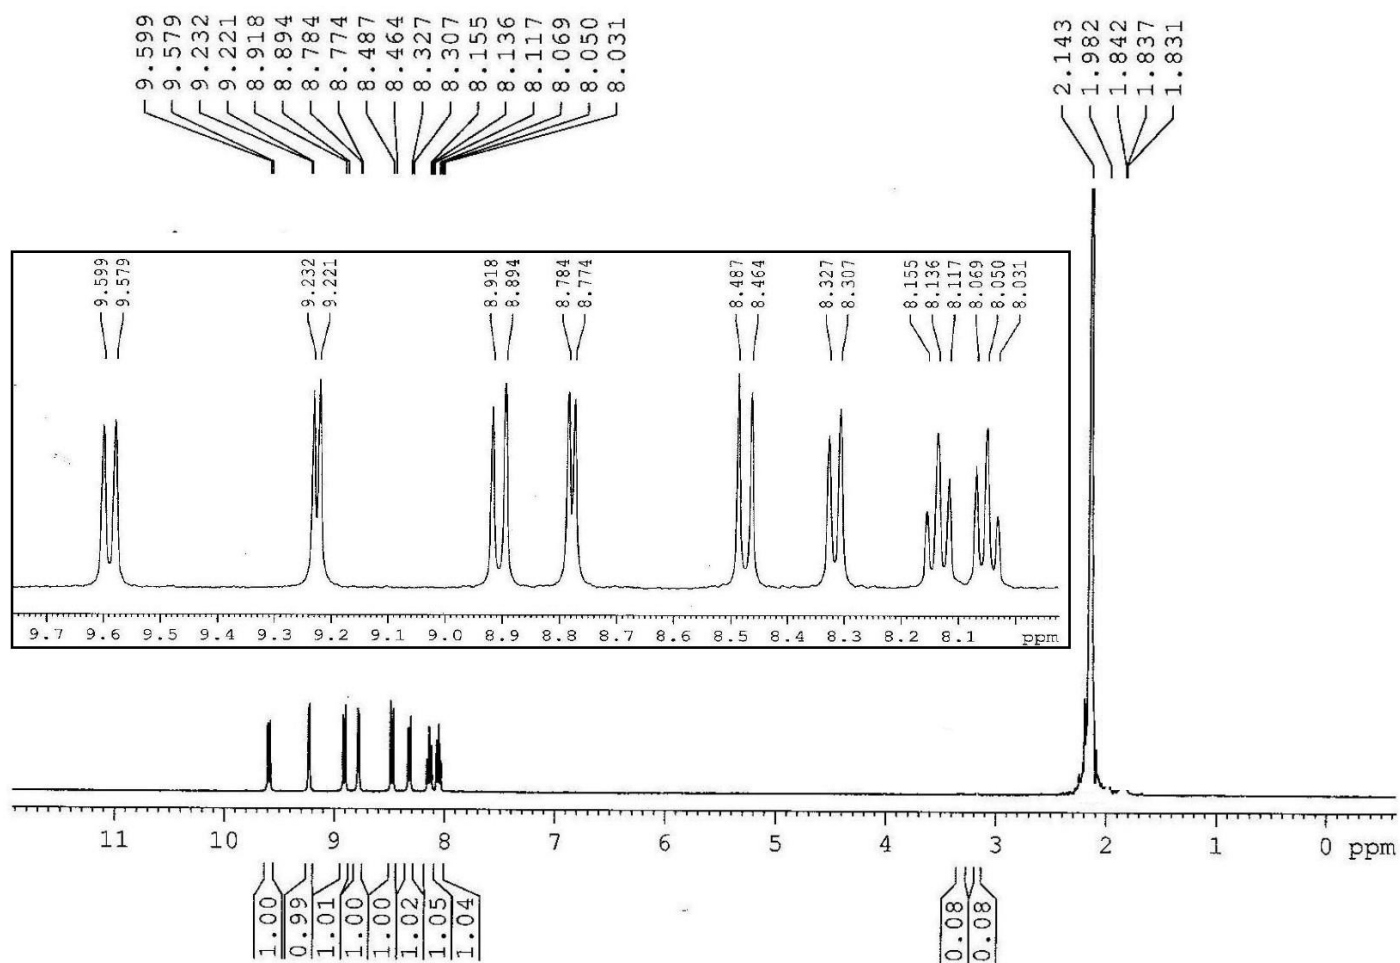

ESI Fig. S6.  $^1\text{H}$  NMR of **1** in  $\text{CD}_3\text{CN}$ .

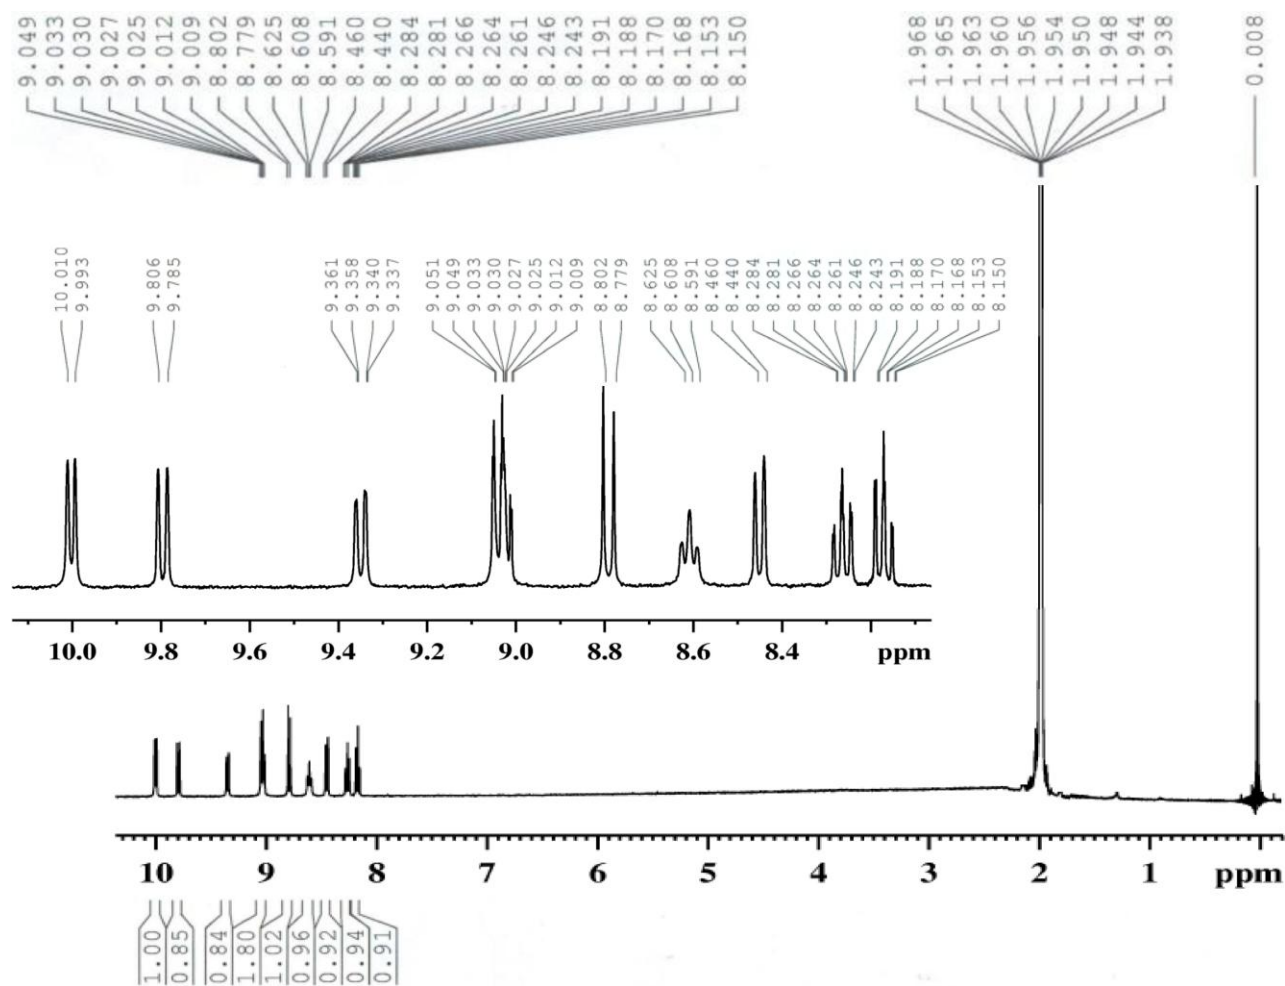

ESI Fig. S7.  $^1\text{H}$  NMR of **2** in  $\text{CD}_3\text{CN}$ .



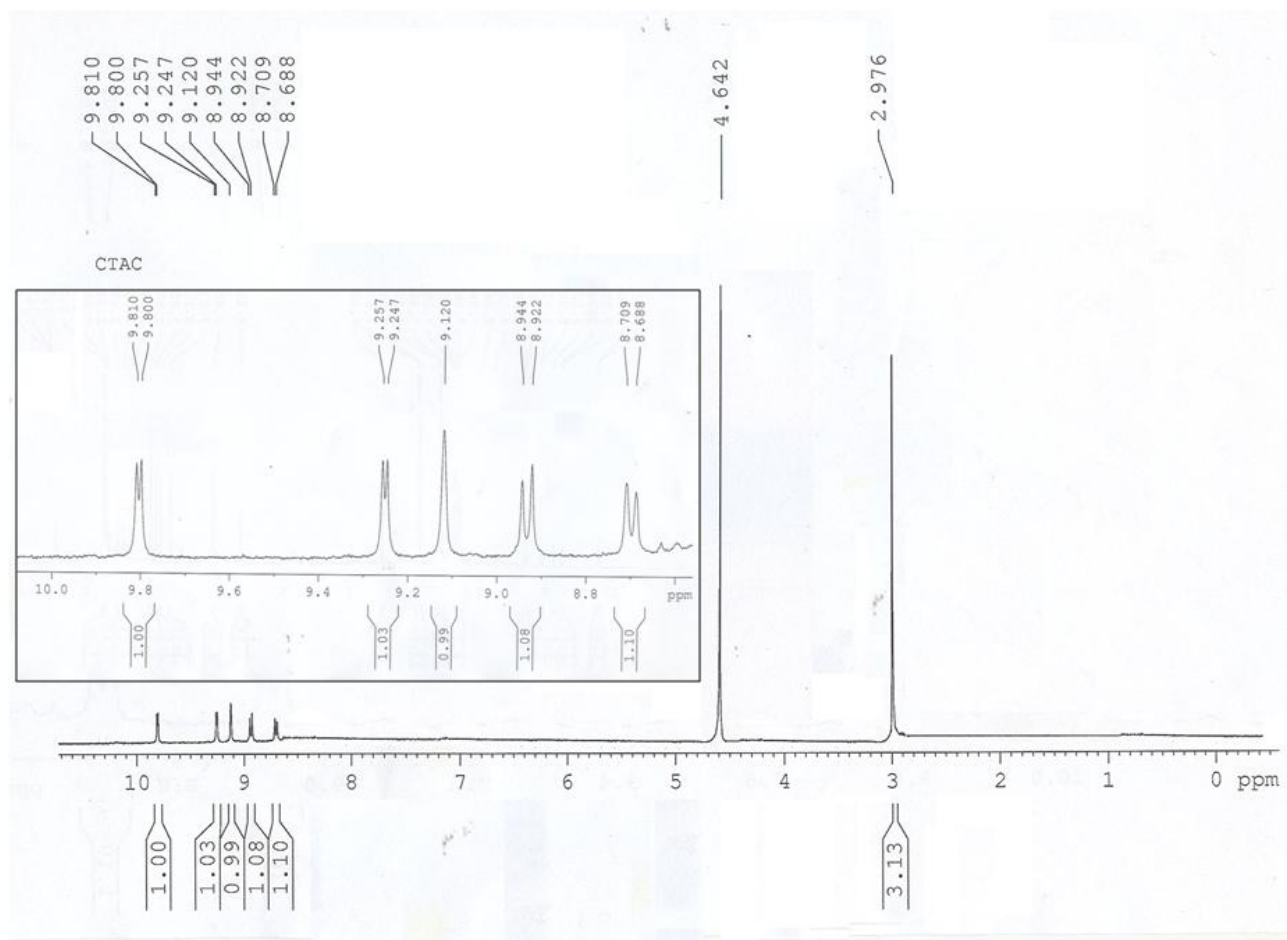

**ESI Fig. S8.**  $^1\text{H}$  NMR of **3** in  $\text{D}_2\text{O}$ .

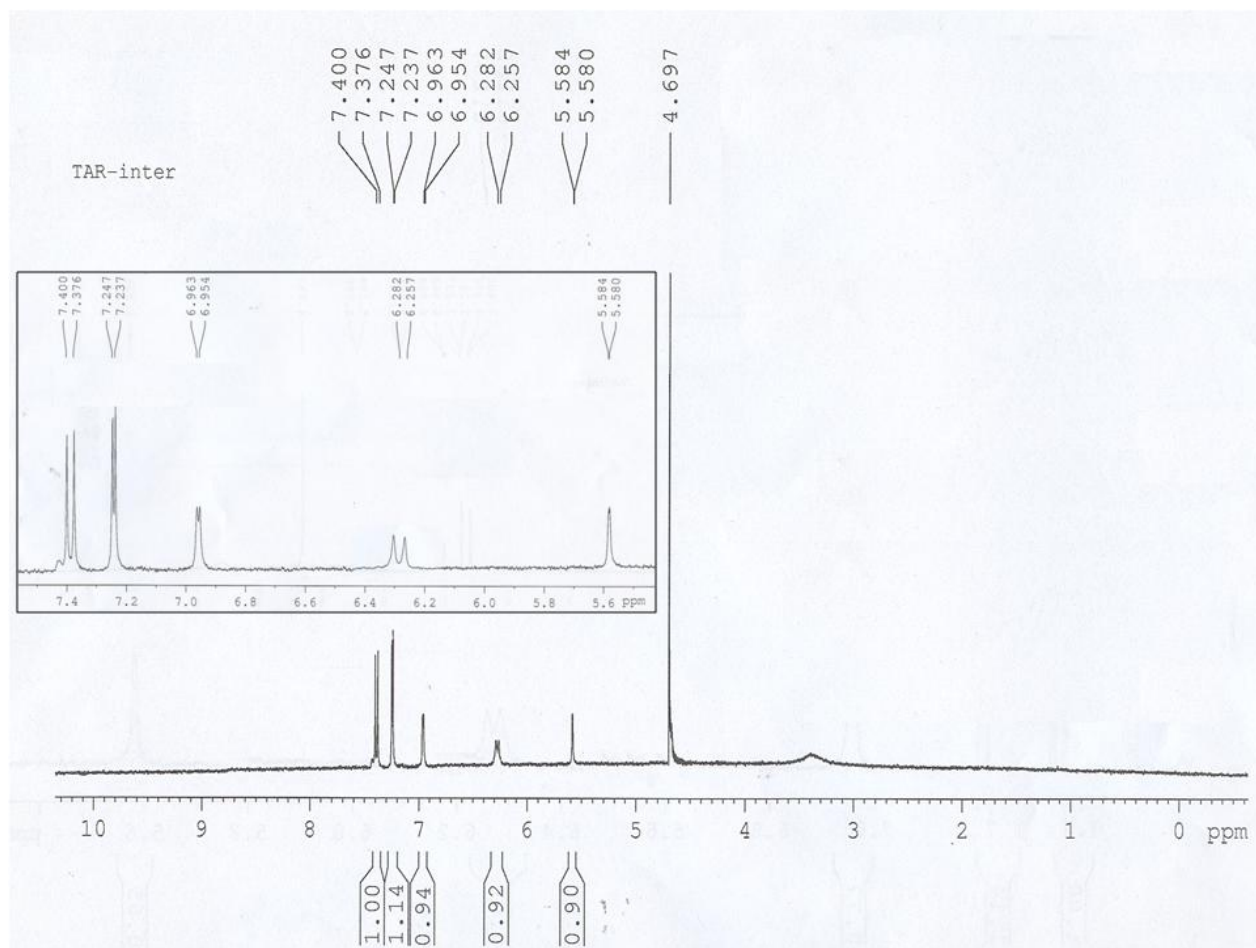

ESI Fig. S9.  $^1\text{H}$  NMR of **4** in  $\text{D}_2\text{O}$ .

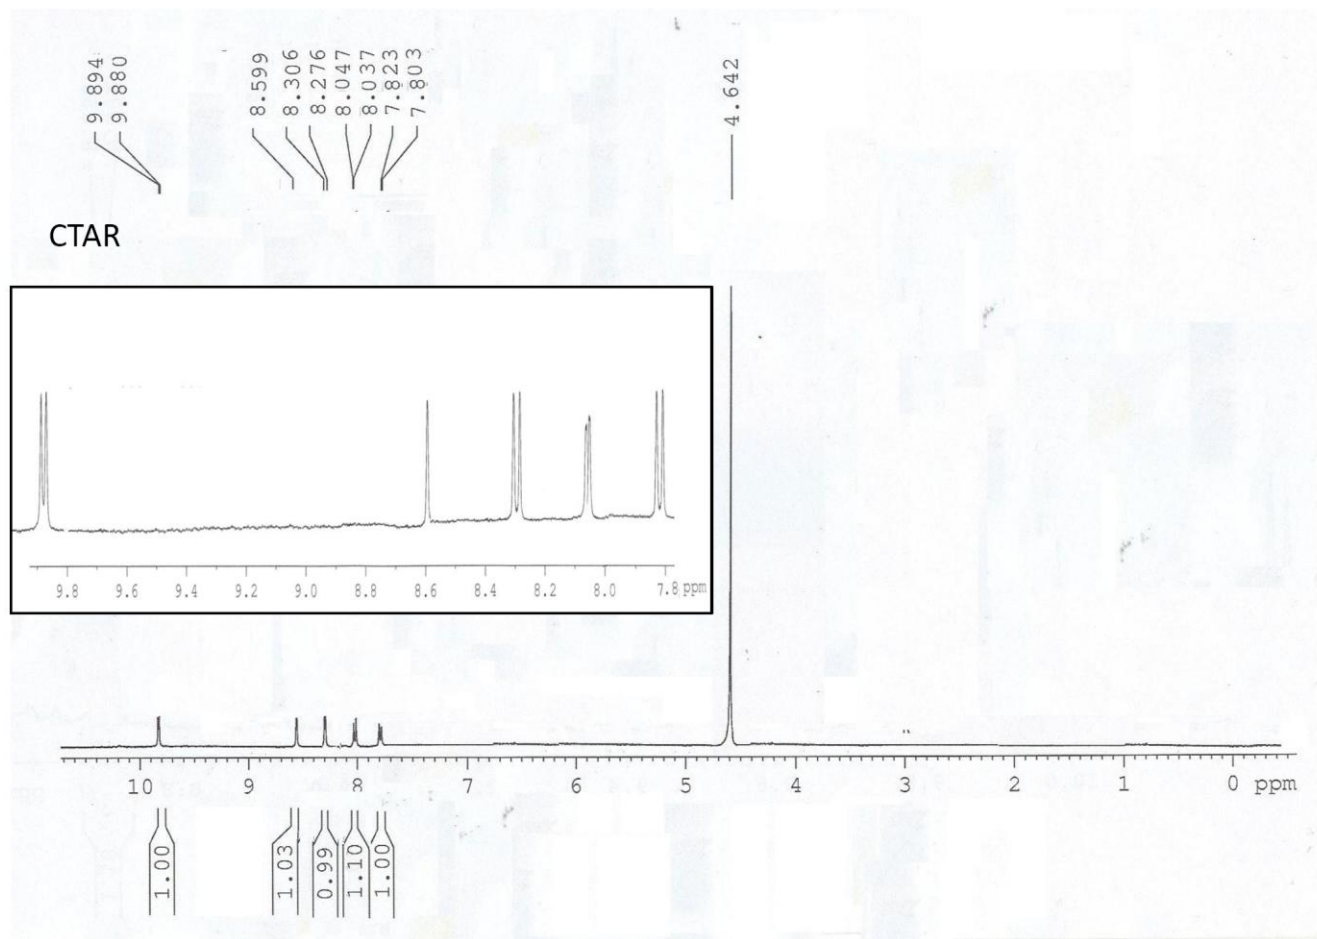

**ESI Fig. S10.**  $^1\text{H}$  NMR of **5** in  $\text{D}_2\text{O}$ .

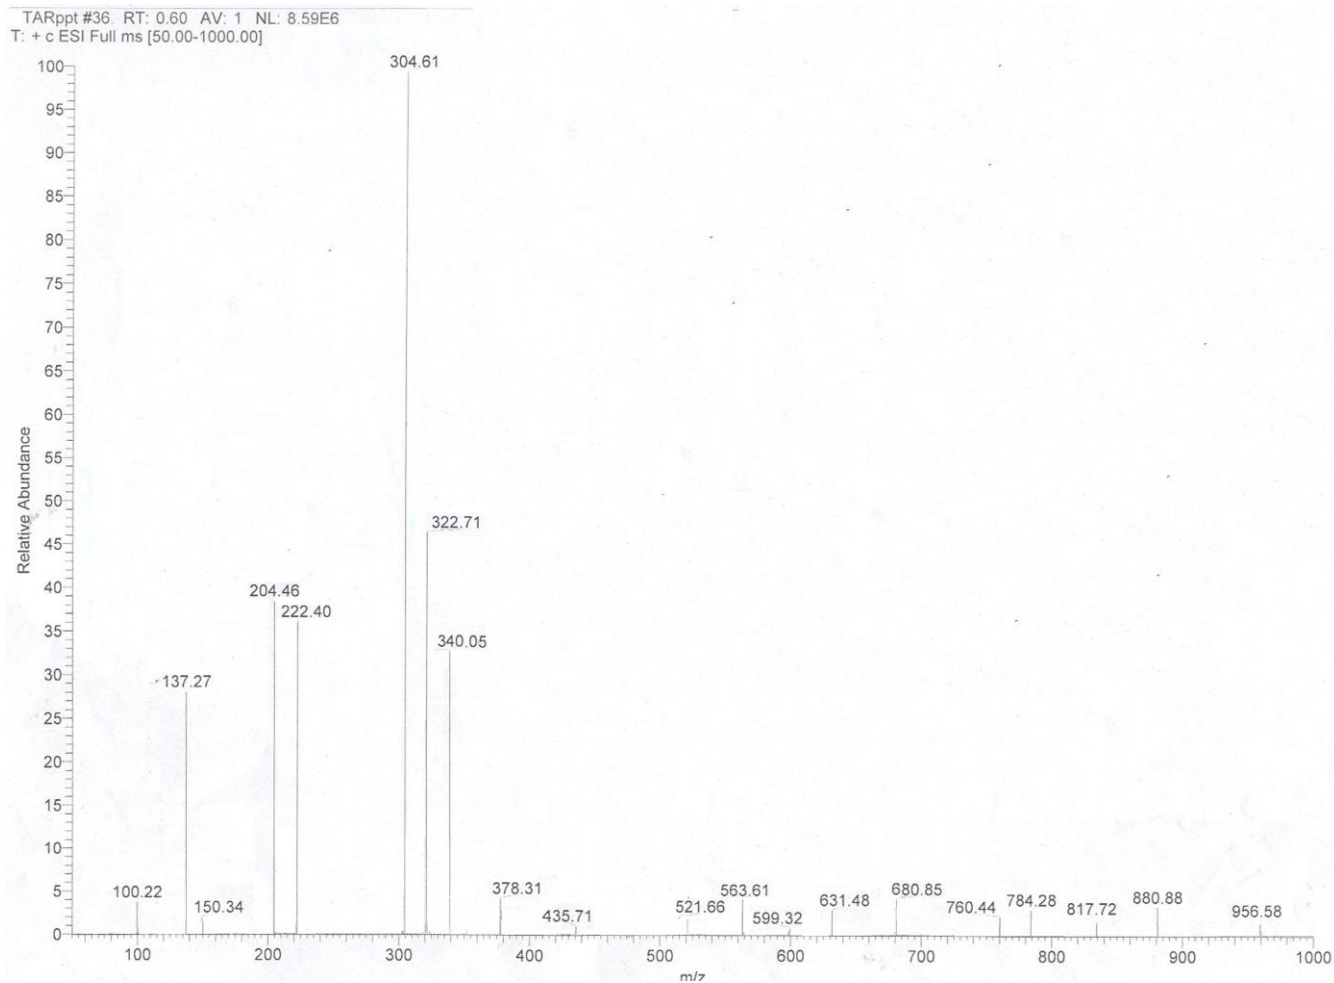

**ESI Fig. S11.** LCMS of the reaction mixture showing the mass peaks of the intermediates formed.

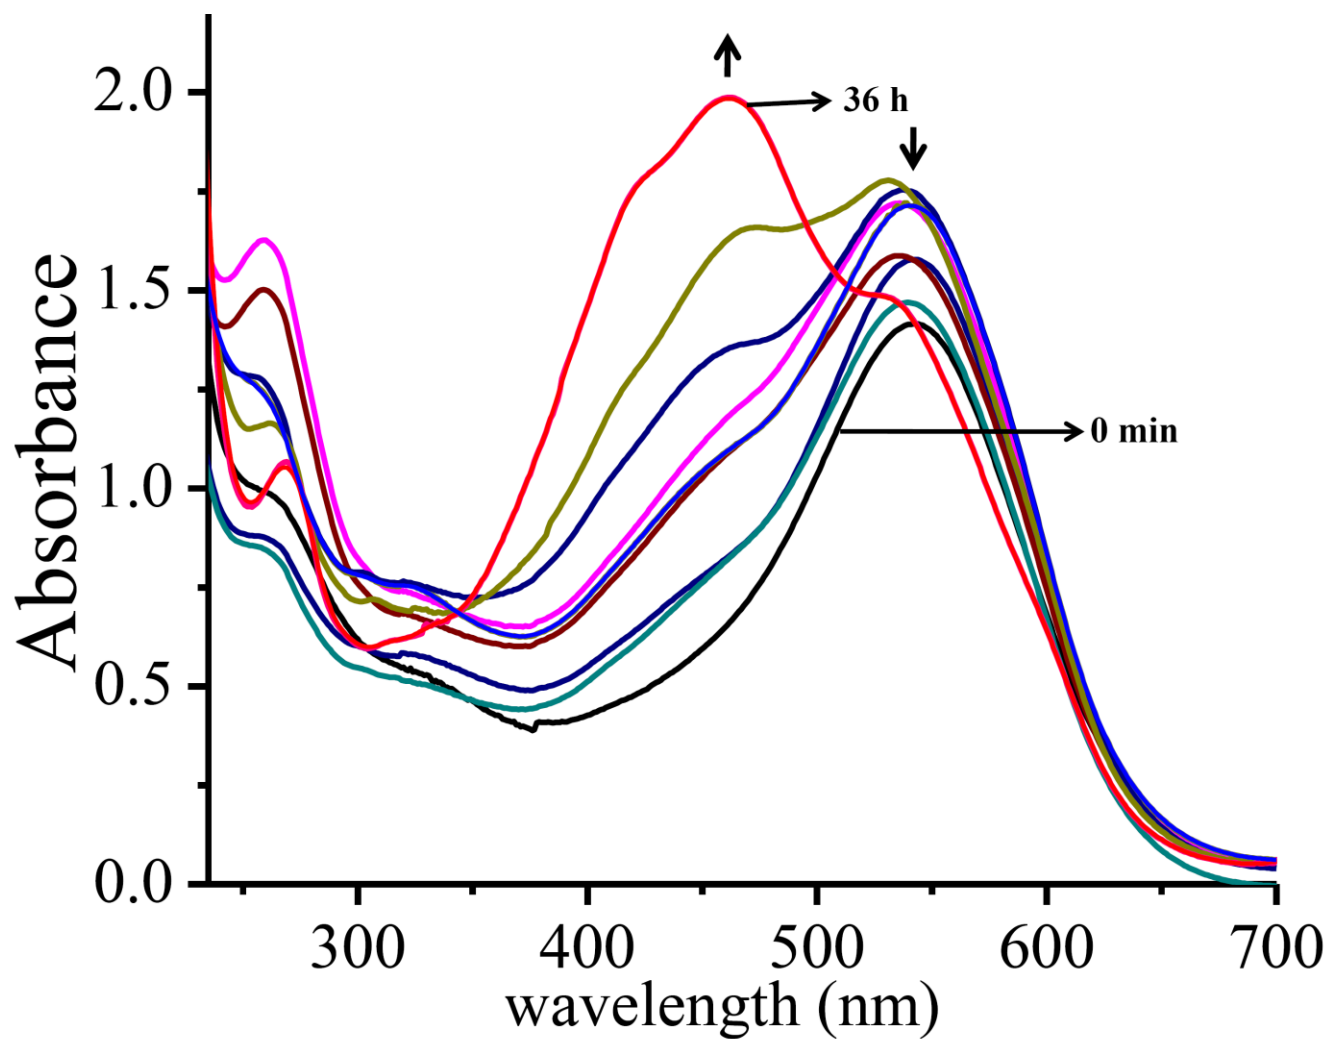

**ESI Fig. S12.** UV-Visible titration spectra of the reaction mixture showing the conversion of complex **4** to compound **5** with the spectra run at equal interval of 4h.

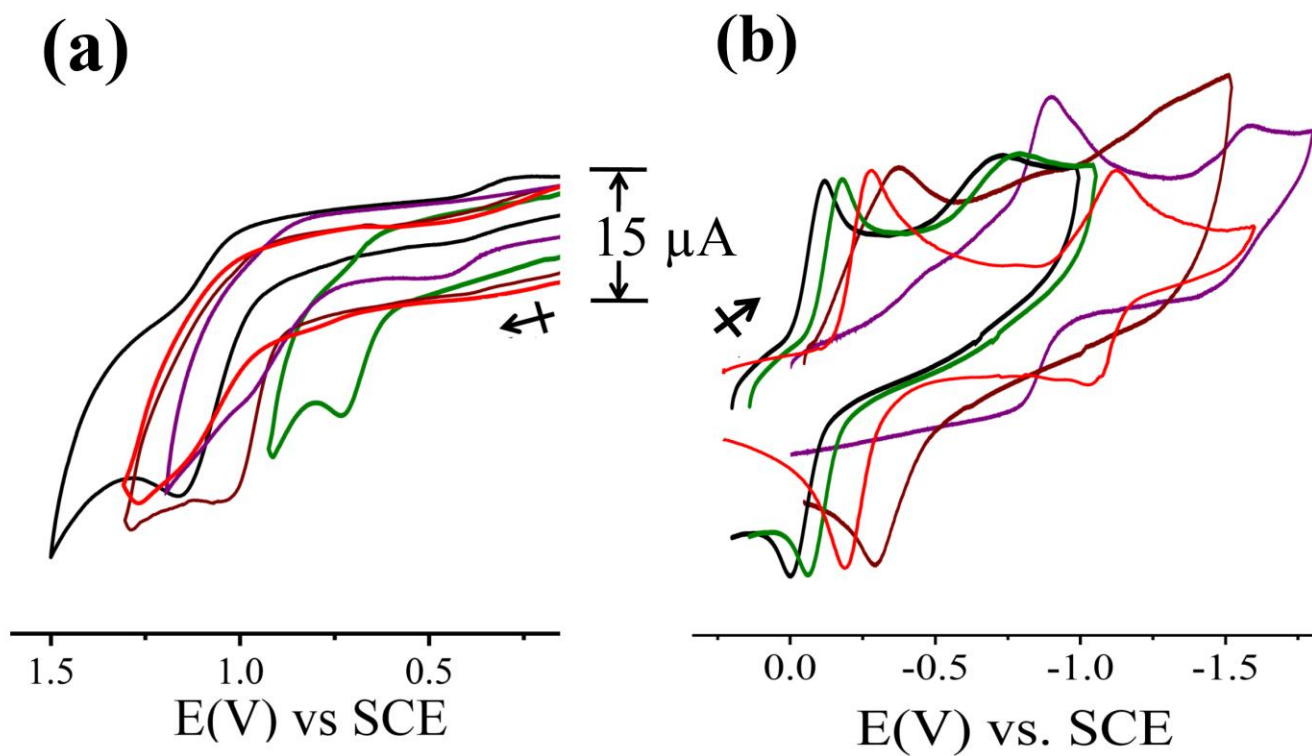

**ESI Fig. S13.** Cyclic voltammograms of the **1** (—), **2** (—), **3** (—), **4** (—) and **5** (—) showing (a) anodic scans and (b) cathodic scans in DMF at a scan speed of 50 mV s<sup>-1</sup> and 0.1 TBAP as a supporting electrolyte.

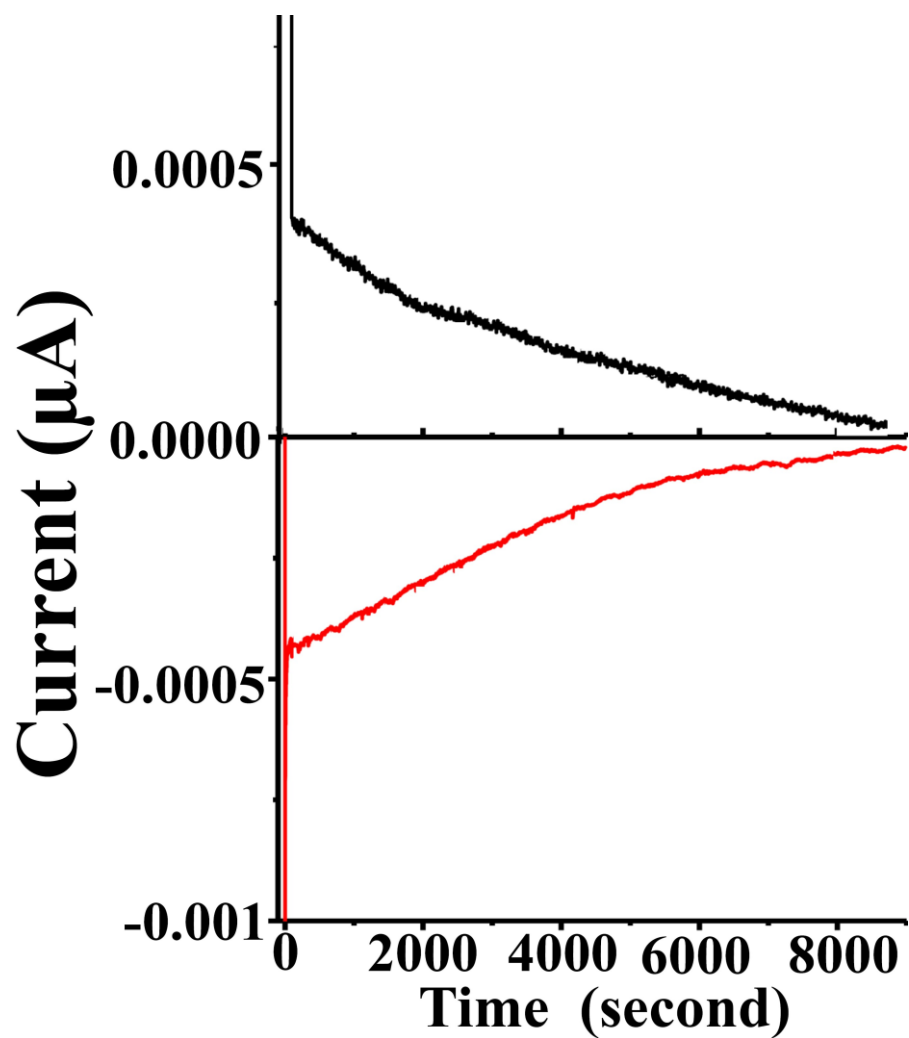

**ESI Fig. S14.** Chronoamperometry at constant potential of 0.65 V for Ferrocene (—) as standard and  $-0.5$  V for **1** (—) respectively, in DMF and 0.1 M TBAP showing one electron transfer.

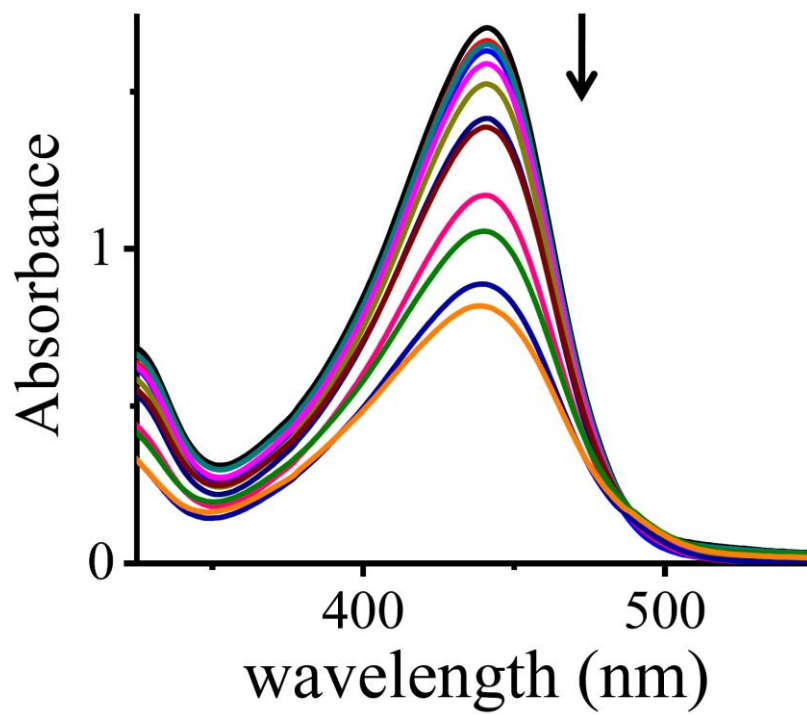

**ESI Fig. S15.** Titration of compound **1** (100  $\mu\text{M}$ ) using sodium dithionite (100  $\mu\text{M}$ ).



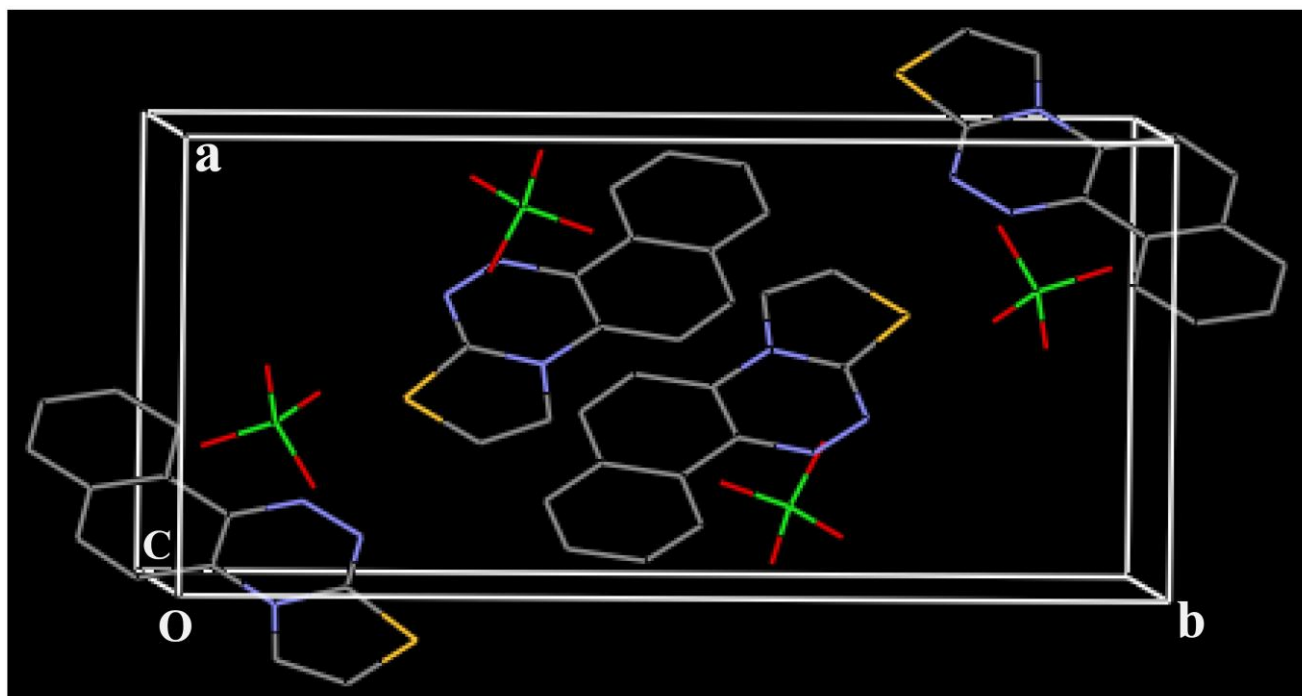

**ESI Fig. S16.** Unit cell packing diagram of **1**.

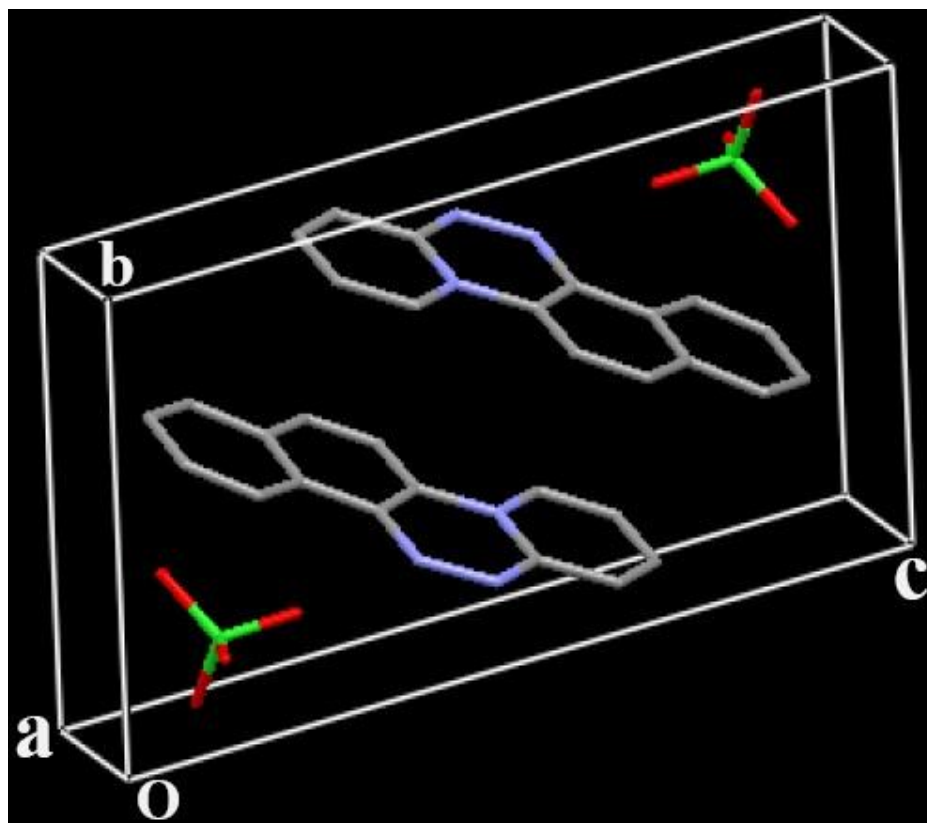

**ESI Fig. S17.** Unit cell packing diagram of **2**.

(a)

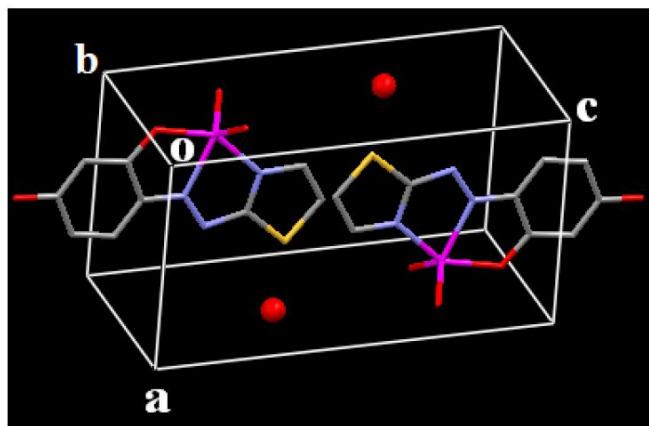

(b)

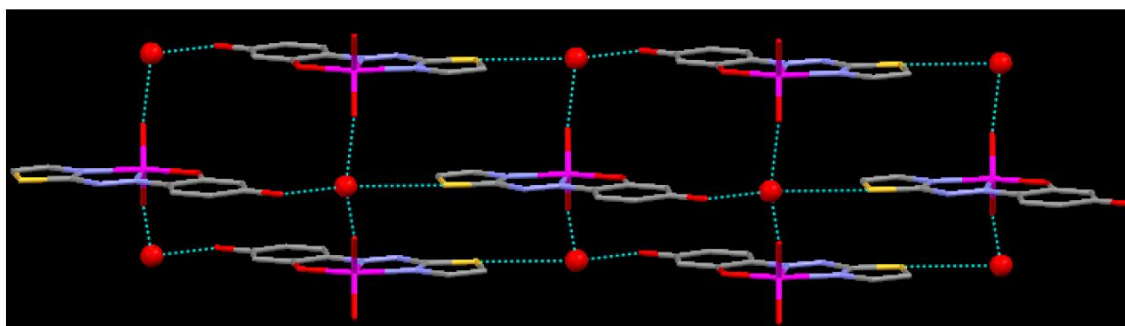

**ESI Fig. S18.** (a) Unit cell packing diagram of **4** and (b) 3D network of hydrogen bond present in **4**.

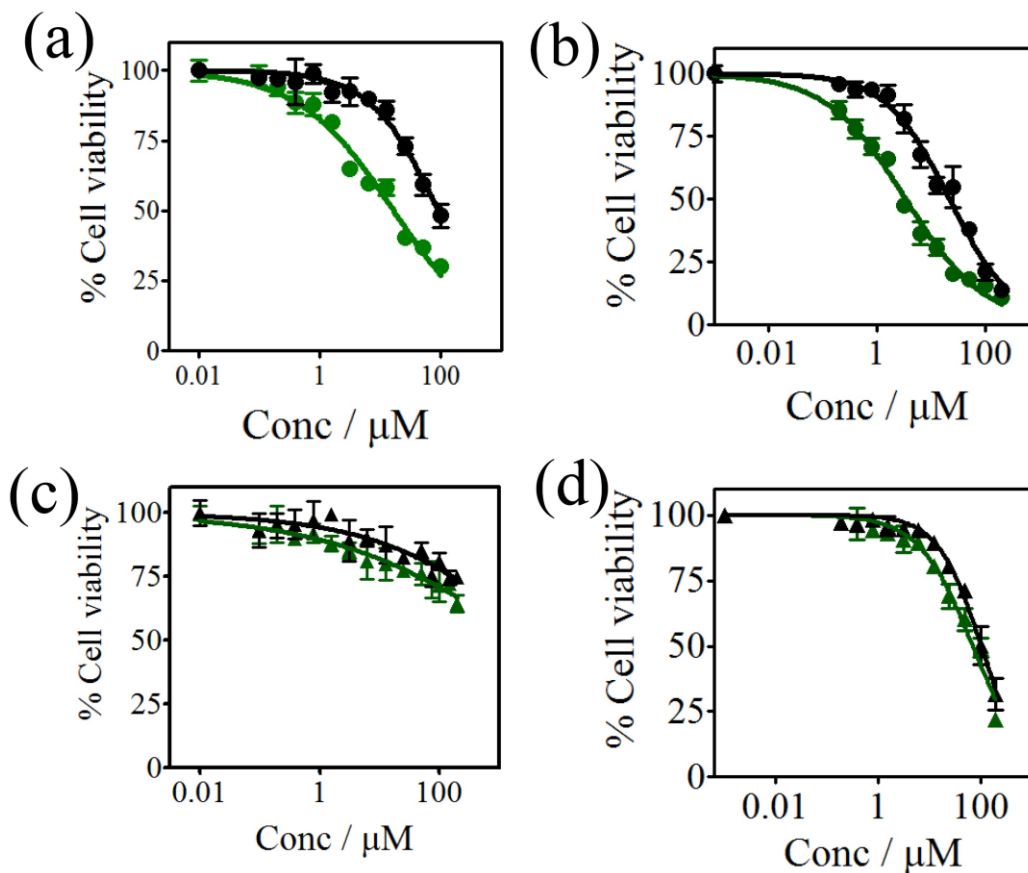

**ESI Fig. S19.** Photocytotoxicity of compound 1 in (a) and (b) and compound 2 in (c) and (d) in cancer cells on 24 h incubation in dark followed upon photo-irradiation in visible light (400 to 700 nm) for 1 h as determined by MTT assay. Panels (a) and (c) are in HeLa cells and Panels (b) and (d) are in MCF-7 cells. The photo-exposed and dark-treated cells are shown in green and black color symbol, respectively.

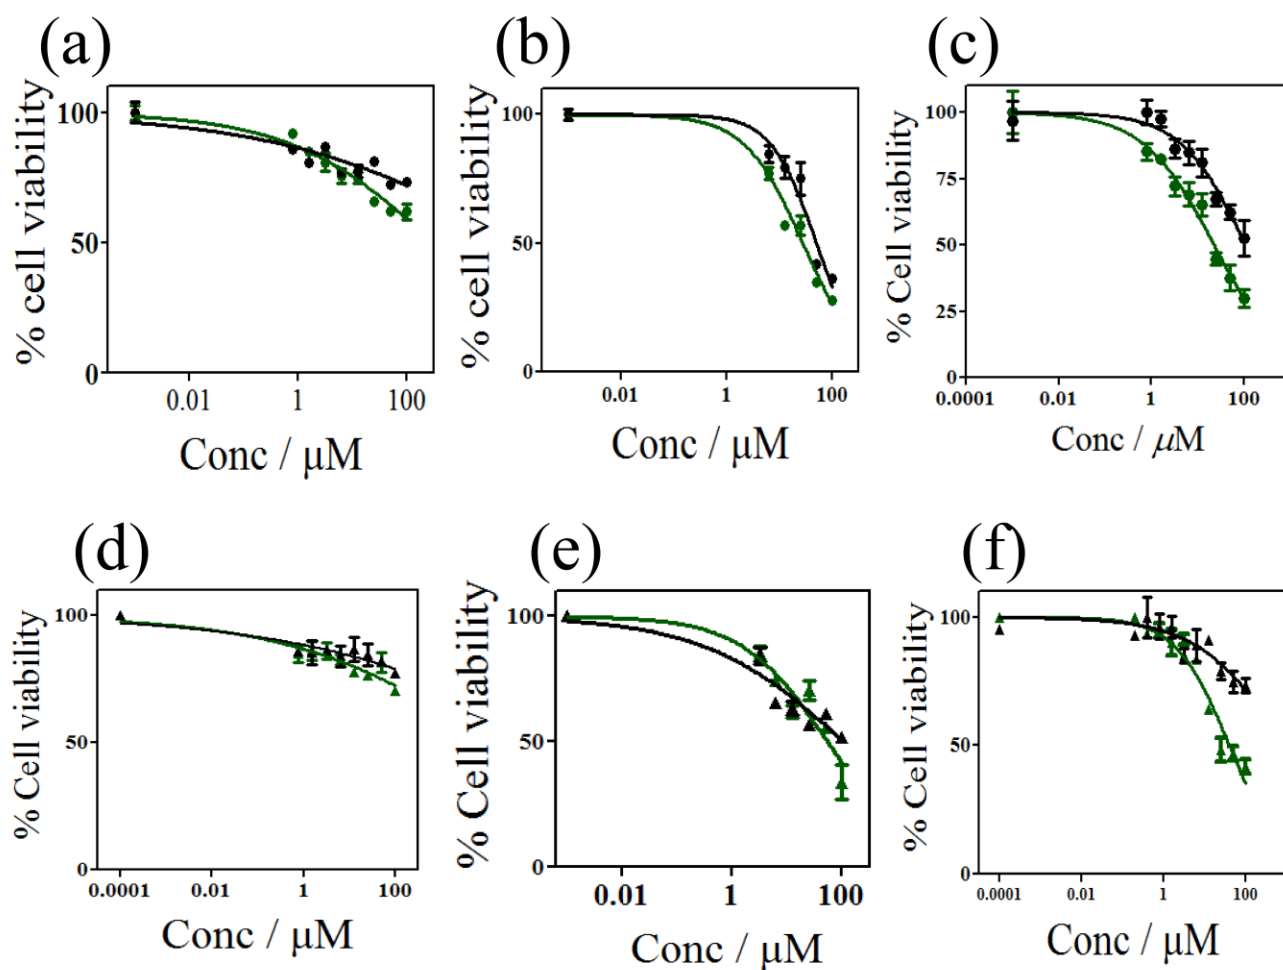

**ESI Fig. S20.** Photocytotoxicity of compound **3** in (a) and (d), compound **4** in (b) and (e) and compound **5** in (c) and (f) in cancer cells on 24 h incubation in dark followed upon photo-irradiation in visible light (400 to 700 nm) for 1 h as determined by MTT assay. Panels (a)-(c) are in HeLa cells and panels (d)-(f) are in MCF-7 cells. The photo-exposed and dark-treated cells are shown in green and black color symbol, respectively.

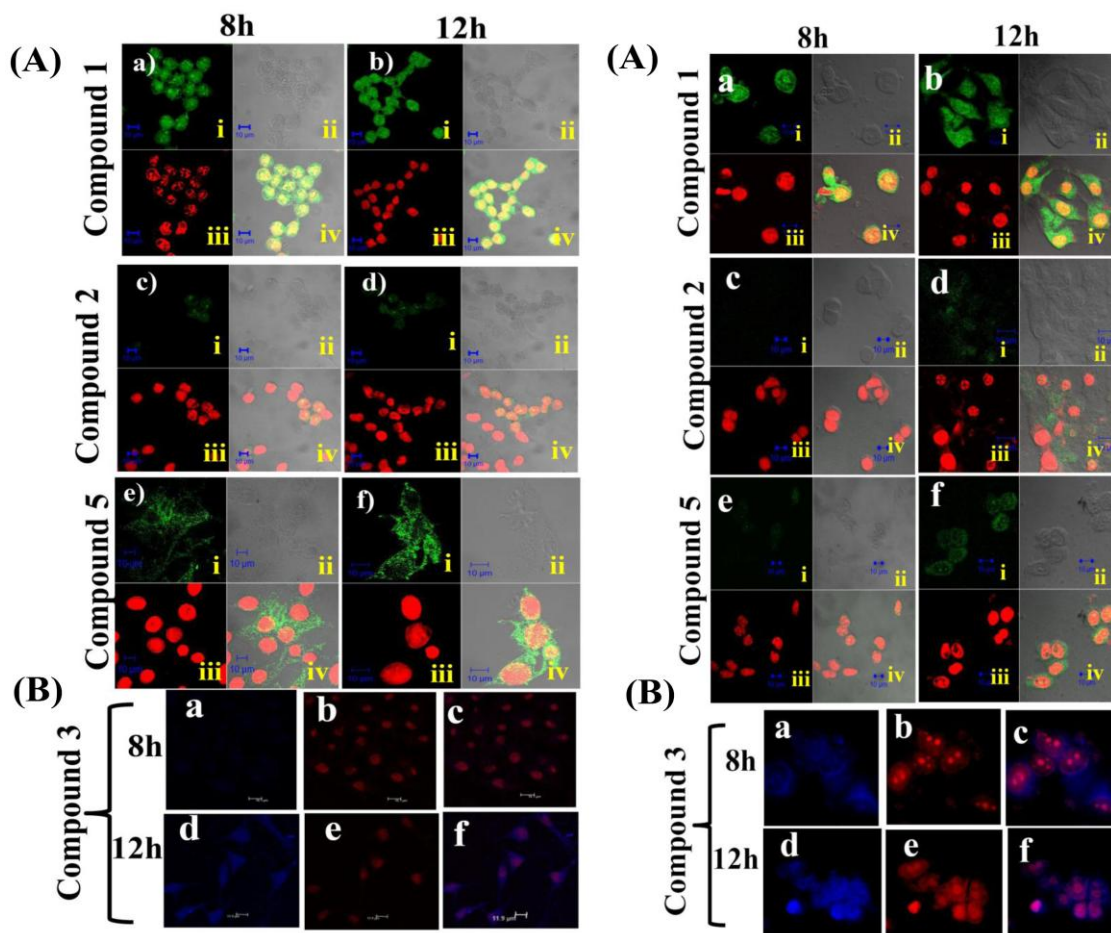

**Fig. S21** (A): Panels (a) and (b) are representative images for compound **1**, (c) and (d) for compound **2** and (e) and (f) for compound **5** in HeLa and MCF-7 cells at time point of 8 h and 12 h, respectively, using 20  $\mu\text{M}$  of compounds **1-3** and **5** in HeLa cells and 10  $\mu\text{M}$  of compound **1-3** and **5** in MCF-7 cells. Panels ((a)-(f)-(i): compounds **1**, **2** and **5** fluorescence. Panels ((a)-(f)-(ii): bright field images. Panels ((a)-(f)-(iii): propidium iodide (PI) staining. Panels ((a)-(f)-(iv): merged images. The uptake of compound **1** in the nucleus increases (evidenced from yellow colour) with time when compared to compound **2** (marginal uptake) in dark. (B): HeLa and MCF-7 cells are treated with 20  $\mu\text{M}$  and 10  $\mu\text{M}$  of **3** at interval of 8 h and 12 h: panels (a),(d): fluorescence of compound **3**, panels (b),(e): fluorescence of PI and panels (c),(f): merged image.

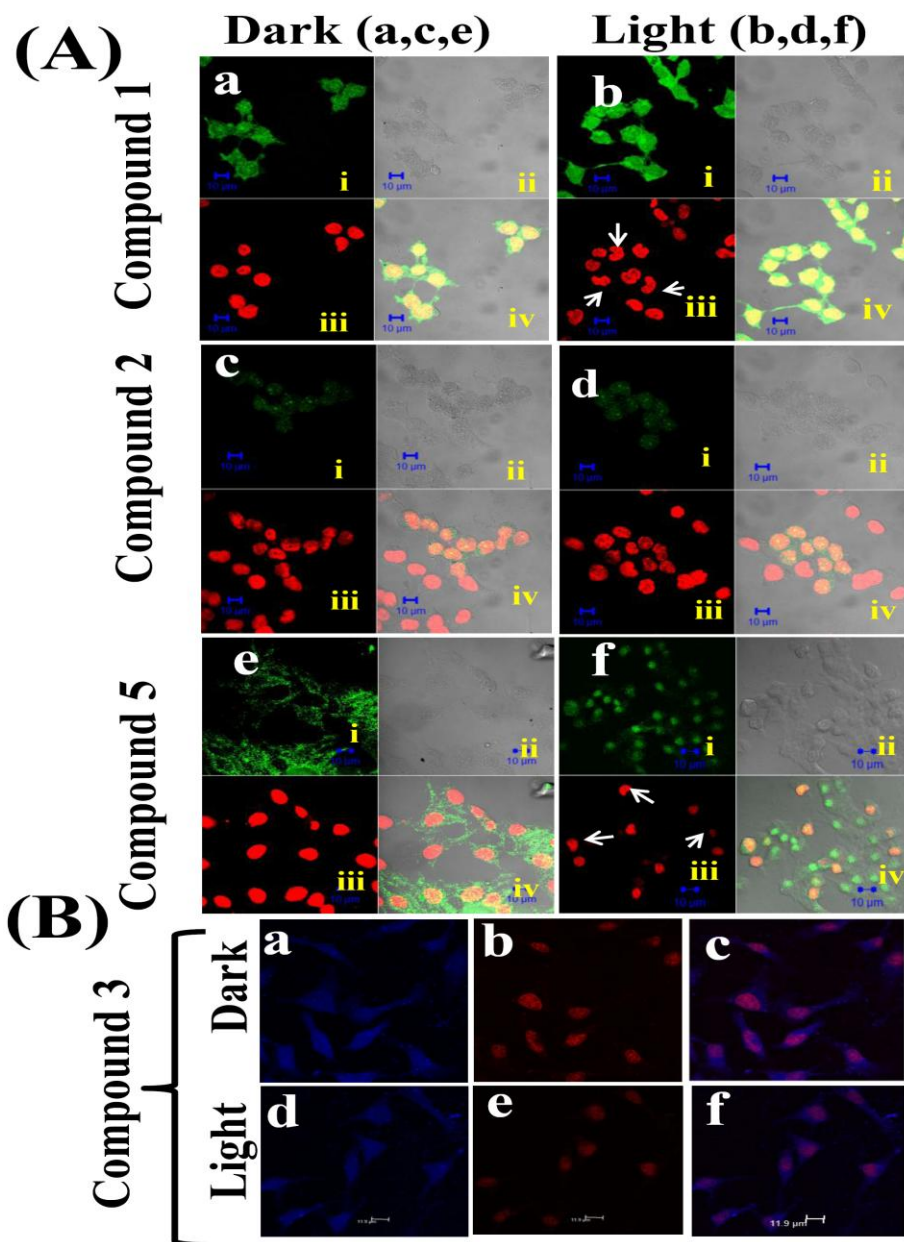

**Fig. 22** (A) Confocal images of 20  $\mu\text{M}$  of **1** (a, b), **2** (c, d) and **5** (e, f) in HeLa cells after 12 h incubation in dark followed by light exposure for 1 h. Panels (i)-(iv) are for fluorescence, bright field, PI-staining and merged images, respectively. The PDT effect is shown for **1** and **5** on light exposure (arrows in b(iii) and f(iii)). No apparent PDT effect for **2** showing marginal nuclear uptake. Scale bar in blue is 10  $\mu\text{m}$ . (B) Confocal images for compound **3** (20  $\mu\text{M}$ ) in HeLa with (a, d) showing compound fluorescence, (b, e) showing PI-staining and (c, f) for merged image.

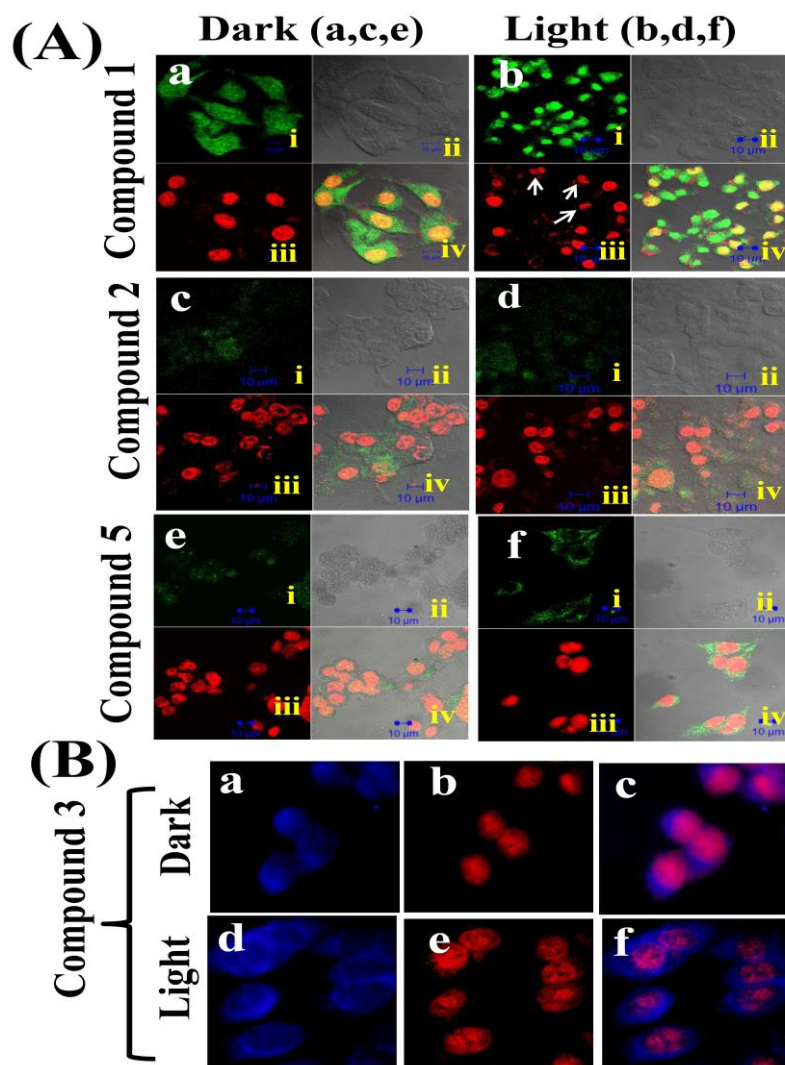

**Fig. 23** (A) Confocal images of 20  $\mu\text{M}$  **1** (a, b), **2** (c, d) and **5** (e, f) in MCF-7 cells after 12 h incubation in dark followed by 1h light-exposure . Panels (i)-(iv) are compound fluorescence, bright field, PI-staining and merged image, respectively. The PDT effect is visible for **1** and **5** in light (arrows in b(iii) and f(iii)). No apparent PDT effect for **2** which shows marginal nuclear uptake. Scale bar in blue is 10  $\mu\text{m}$ . Confocal images for compound **3** (20  $\mu\text{M}$ ) in HeLa with (a, d) showing compound fluorescence, (b, e) showing PI-staining (c, f) for merged image.



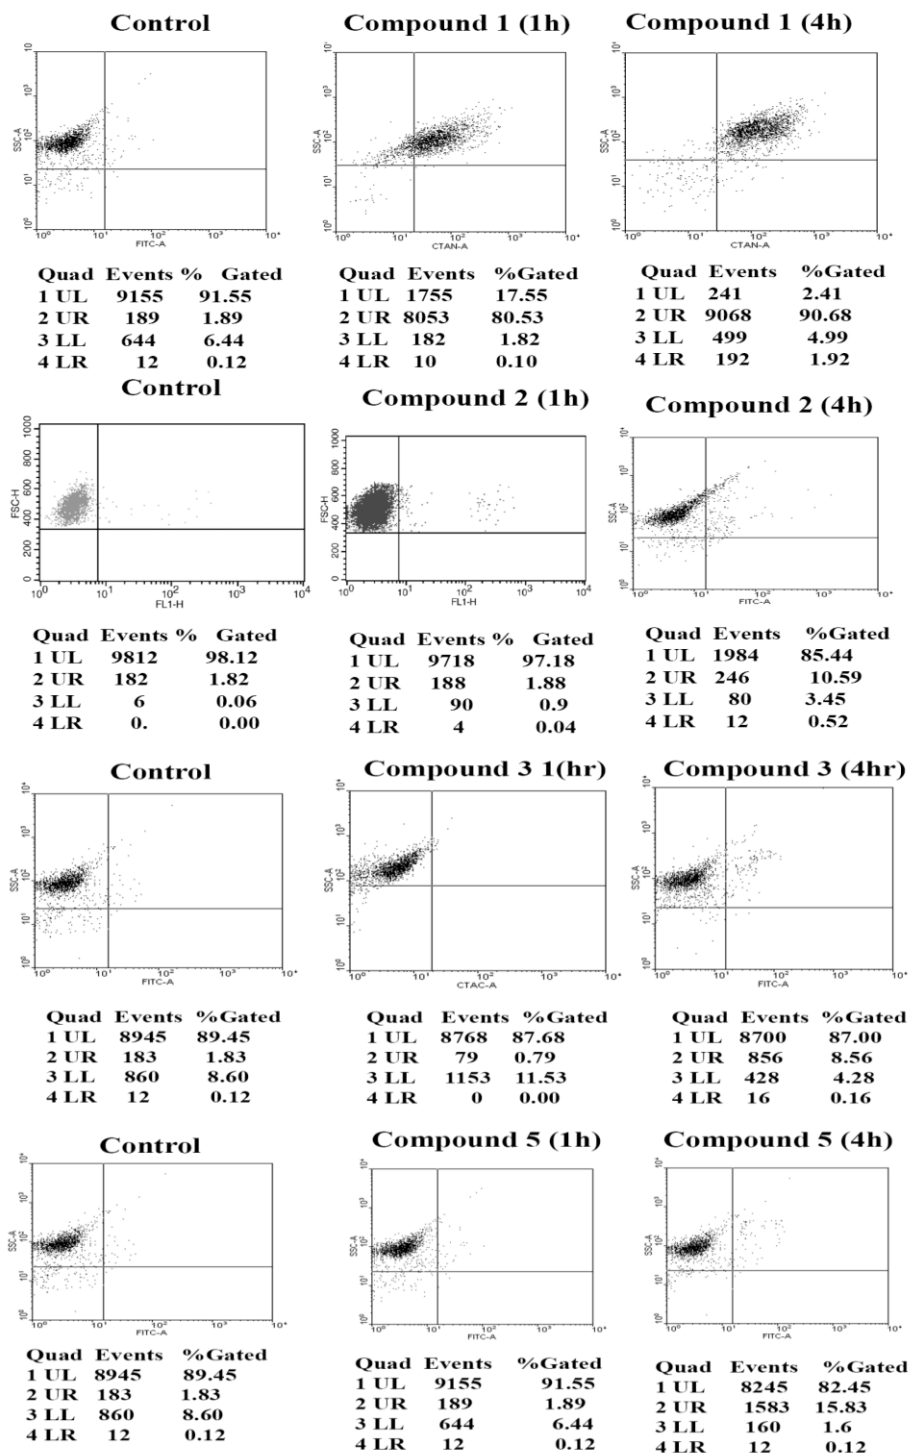

**ESI Fig. S24.** Flow cytometric analysis (FACS) done for compounds 1-3 and 5 (20  $\mu$ M) in HeLa cells at different incubation time of 1h and 4h.

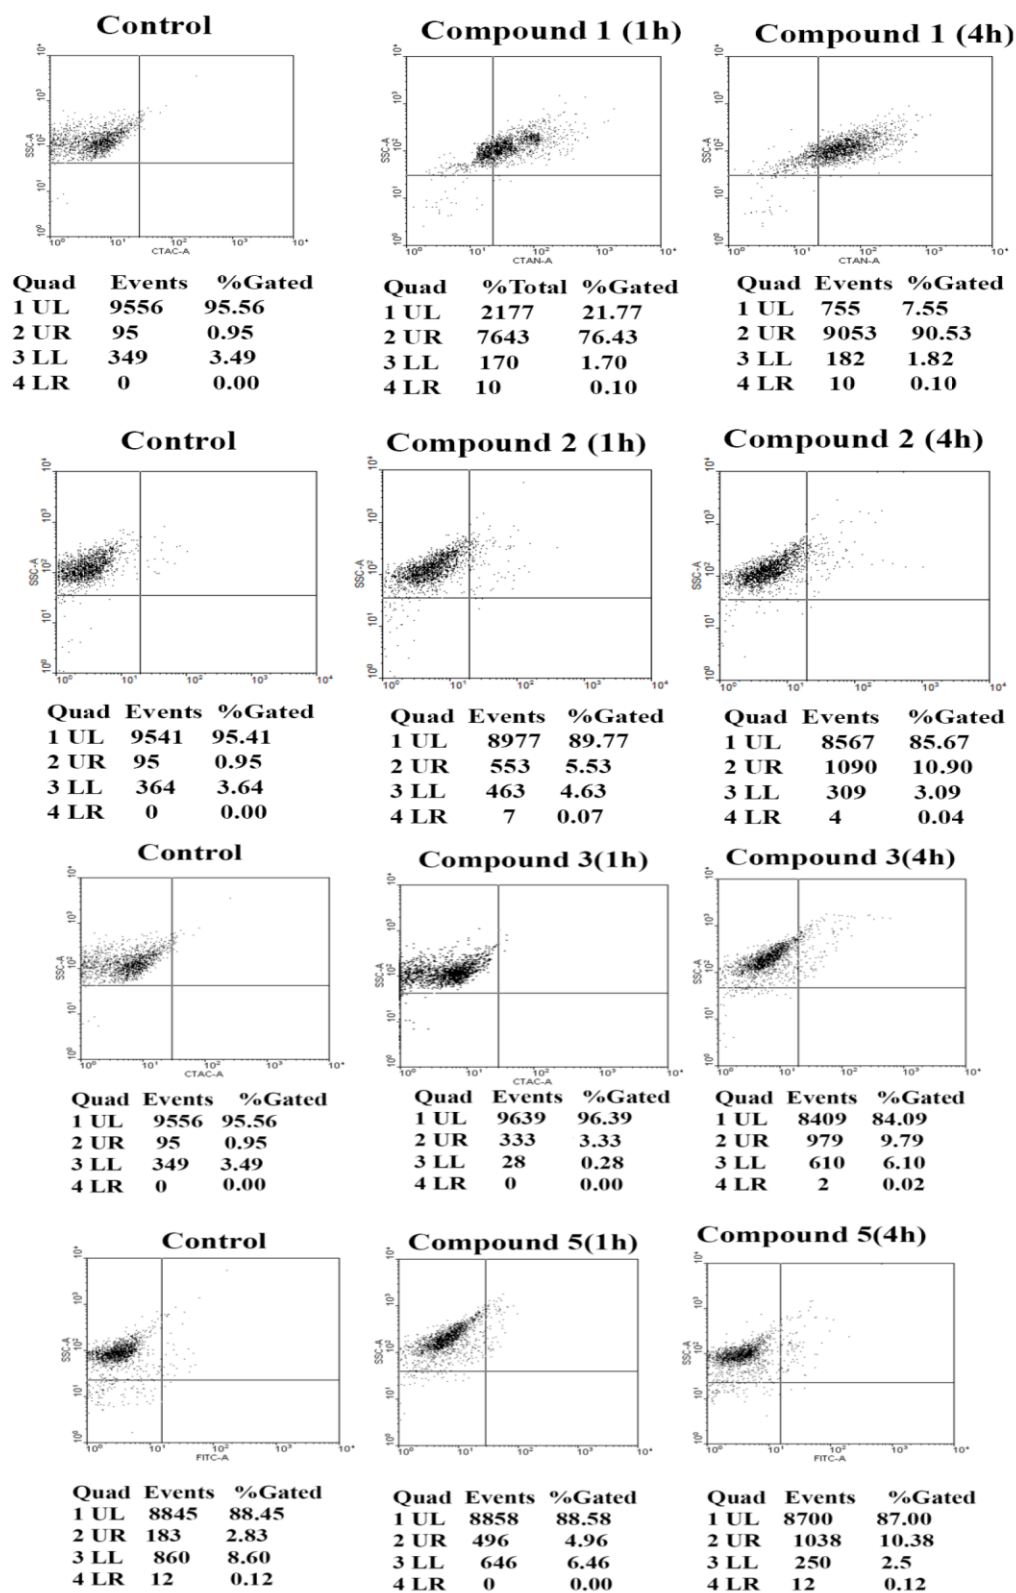

**ESI Fig. S25.** Flow cytometric analysis (FACS) done for compounds **1-3** and **5** (10  $\mu$ M) in MCF-7 cells at different incubation time of 1h and 4h.

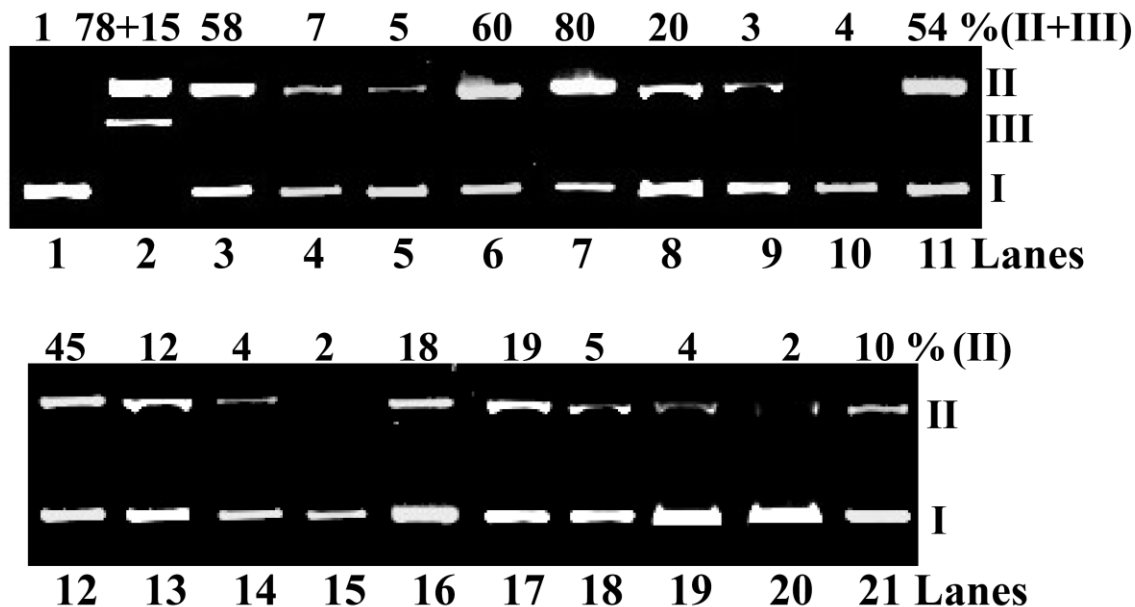

**ESI Fig. S26.** Cleavage of SC pUC19 DNA (0.2  $\mu$ g, 30  $\mu$ M) by compounds **1 - 5** (20  $\mu$ M) in **argon** medium in 50 mM Tris-HCl/NaCl buffer (pH, 7.2) containing 0.1% DMF in visible light of different wavelengths for an exposure time of 2 h. Detailed reaction conditions are given below in a tabular form. Form **I**, **II** and **III** are the SC, NC and linear forms of plasmid DNA.

| Lane No | $\lambda$ /nm | Reaction conditions | Lane No | $\lambda$ /nm | Reaction conditions |
|---------|---------------|---------------------|---------|---------------|---------------------|
| 1       | 458 nm        | DNA control         | 12      | 514 nm        | DNA + <b>1</b>      |
| 2       | 458 nm        | DNA + <b>1</b>      | 13      | 514 nm        | DNA + <b>2</b>      |
| 3       | 458 nm        | DNA + <b>2</b>      | 14      | 514 nm        | DNA + <b>3</b>      |
| 4       | 458 nm        | DNA + <b>3</b>      | 15      | 514 nm        | DNA + <b>4</b>      |
| 5       | 458 nm        | DNA + <b>4</b>      | 16      | 514 nm        | DNA + <b>5</b>      |
| 6       | 458 nm        | DNA + <b>5</b>      | 17      | 647 nm        | DNA + <b>1</b>      |
| 7       | 488 nm        | DNA + <b>1</b>      | 18      | 647 nm        | DNA + <b>2</b>      |
| 8       | 488 nm        | DNA + <b>2</b>      | 19      | 647 nm        | DNA + <b>3</b>      |
| 9       | 488 nm        | DNA + <b>3</b>      | 20      | 647 nm        | DNA + <b>4</b>      |
| 10      | 488 nm        | DNA + <b>4</b>      | 21      | 647 nm        | DNA + <b>5</b>      |
| 11      | 488 nm        | DNA + <b>5</b>      |         |               |                     |

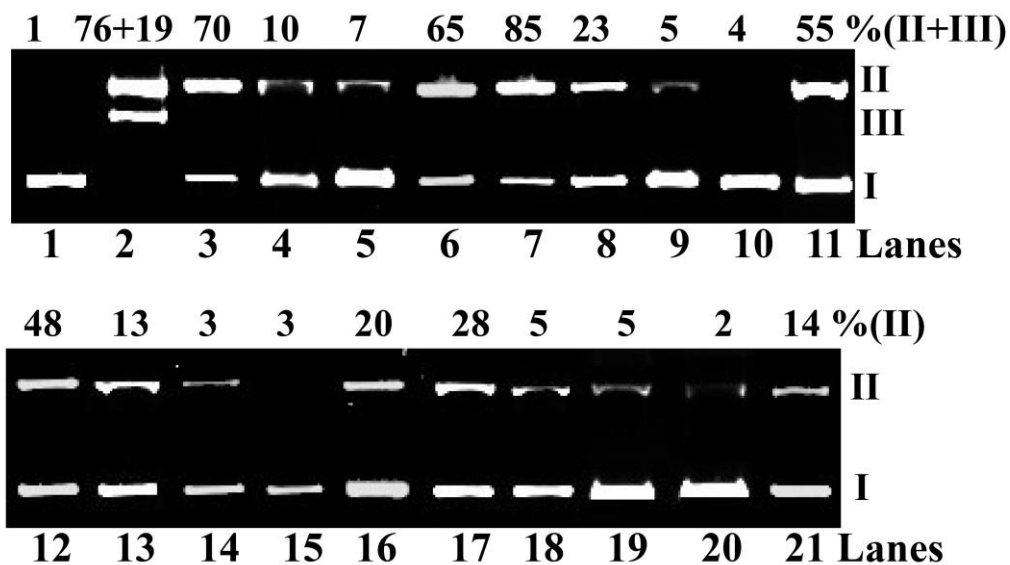

**ESI Fig. S27.** Cleavage of SC pUC19 DNA (0.2  $\mu$ g, 30  $\mu$ M) by compound **1** - **5** (20  $\mu$ M) in air medium in 50 mM Tris-HCl/NaCl buffer (pH, 7.2) containing 0.1% DMF in visible light of different wavelength for an exposure time of 2 h. Detailed reaction conditions are given below in a tabular form. Form **I**, **II** and **III** are the SC, NC and linear forms of plasmid DNA.

| Lane No | $\lambda$ /nm | Reaction conditions | Lane No | $\lambda$ /nm | Reaction conditions |
|---------|---------------|---------------------|---------|---------------|---------------------|
| 1       | 458 nm        | DNA control         | 12      | 514 nm        | DNA + <b>1</b>      |
| 2       | 458 nm        | DNA + <b>1</b>      | 13      | 514 nm        | DNA + <b>2</b>      |
| 3       | 458 nm        | DNA + <b>2</b>      | 14      | 514 nm        | DNA + <b>3</b>      |
| 4       | 458 nm        | DNA + <b>3</b>      | 15      | 514 nm        | DNA + <b>4</b>      |
| 5       | 458 nm        | DNA + <b>4</b>      | 16      | 514 nm        | DNA + <b>5</b>      |
| 6       | 458 nm        | DNA + <b>5</b>      | 17      | 647 nm        | DNA + <b>1</b>      |
| 7       | 488 nm        | DNA + <b>1</b>      | 18      | 647 nm        | DNA + <b>2</b>      |
| 8       | 488 nm        | DNA + <b>2</b>      | 19      | 647 nm        | DNA + <b>3</b>      |
| 9       | 488 nm        | DNA + <b>3</b>      | 20      | 647 nm        | DNA + <b>4</b>      |
| 10      | 488 nm        | DNA + <b>4</b>      | 21      | 647 nm        | DNA + <b>5</b>      |
| 11      | 488 nm        | DNA + <b>5</b>      |         |               |                     |

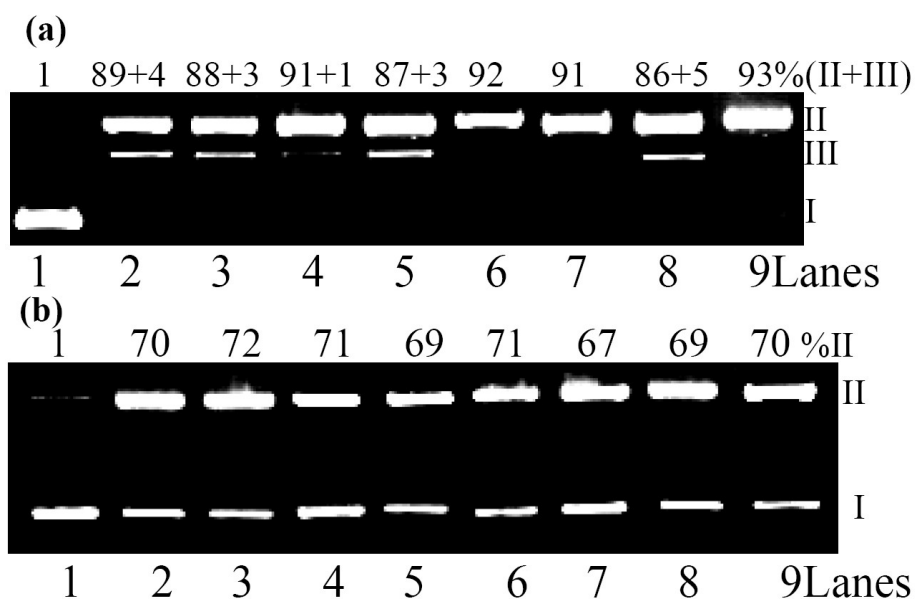

**ESI Fig. S28.** Gel electrophoresis diagram showing the photocleavage of SC pUC19 DNA (0.2 μg, 30 μM) at 458 nm by **1** (20 μM) in (a) and **2** (20 μM) in (b) in argon medium in the presence of different additives for 1 h exposure time in 50 mM Tris-HCl / NaCl buffer (pH, 7.2). Detail conditions are given below in a tabular form. Form **I**, **II** and **III** are the SC, NC and linear forms of plasmid DNA.

| Lane No. | Reaction condition                  |
|----------|-------------------------------------|
| 1        | DNA                                 |
| 2        | DNA + Compound                      |
| 3        | DNA + Compound + D <sub>2</sub> O   |
| 4        | DNA + Compound + TEMP (1 mmol)      |
| 5        | DNA + Compound + DABCO (1 mmol)     |
| 6        | DNA + Compound + KI (1 mmol)        |
| 7        | DNA + Compound + DMSO (6 μl)        |
| 8        | DNA + Compound + Catalase (6 units) |
| 9        | DNA + Compound + SOD (6 units)      |

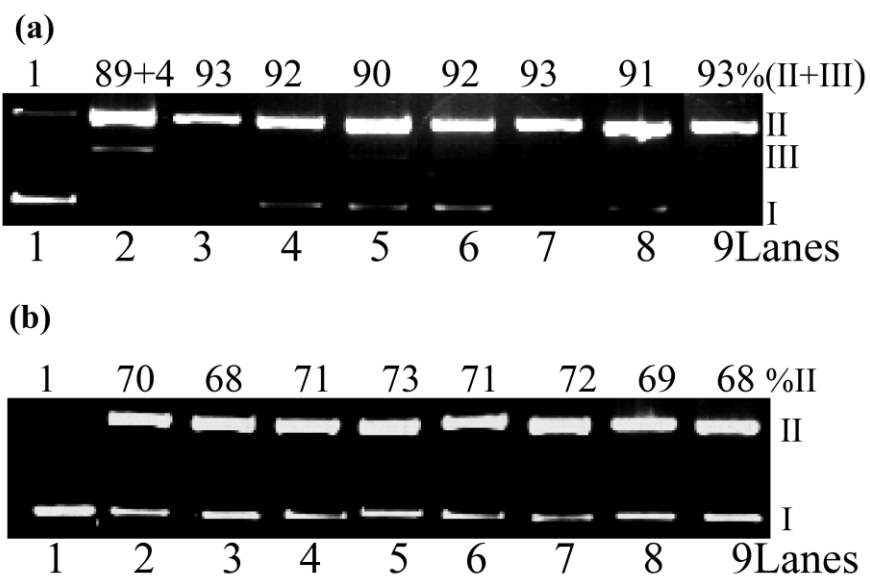

**ESI Fig. S29.** Gel electrophoresis diagram displaying the photocleavage of SC pUC19 DNA (0.2  $\mu\text{g}$ , 30  $\mu\text{M}$ ) at 458 nm by **1** (20  $\mu\text{M}$ ) in (a) and **2** (20  $\mu\text{M}$ ) in (b) in the presence of different additives for 1 h exposure time in 50 mM Tris-HCl / NaCl buffer (pH, 7.2). Detail conditions are given below in a tabular form. Form **I**, **II** and **III** are the SC, NC and linear forms of plasmid DNA.

| Lane No. | Reaction condition                       |
|----------|------------------------------------------|
| 1        | DNA                                      |
| 2        | DNA + Compound                           |
| 3        | DNA + Compound + D <sub>2</sub> O        |
| 4        | DNA + Compound + TEMP (1 mM)             |
| 5        | DNA + Compound + DABCO (1 mM)            |
| 6        | DNA + Compound + KI (1 mM)               |
| 7        | DNA + Compound + DMSO (6 $\mu\text{L}$ ) |
| 8        | DNA + Compound + Catalase (6 units)      |
| 9        | DNA + Compound + SOD (6 units)           |

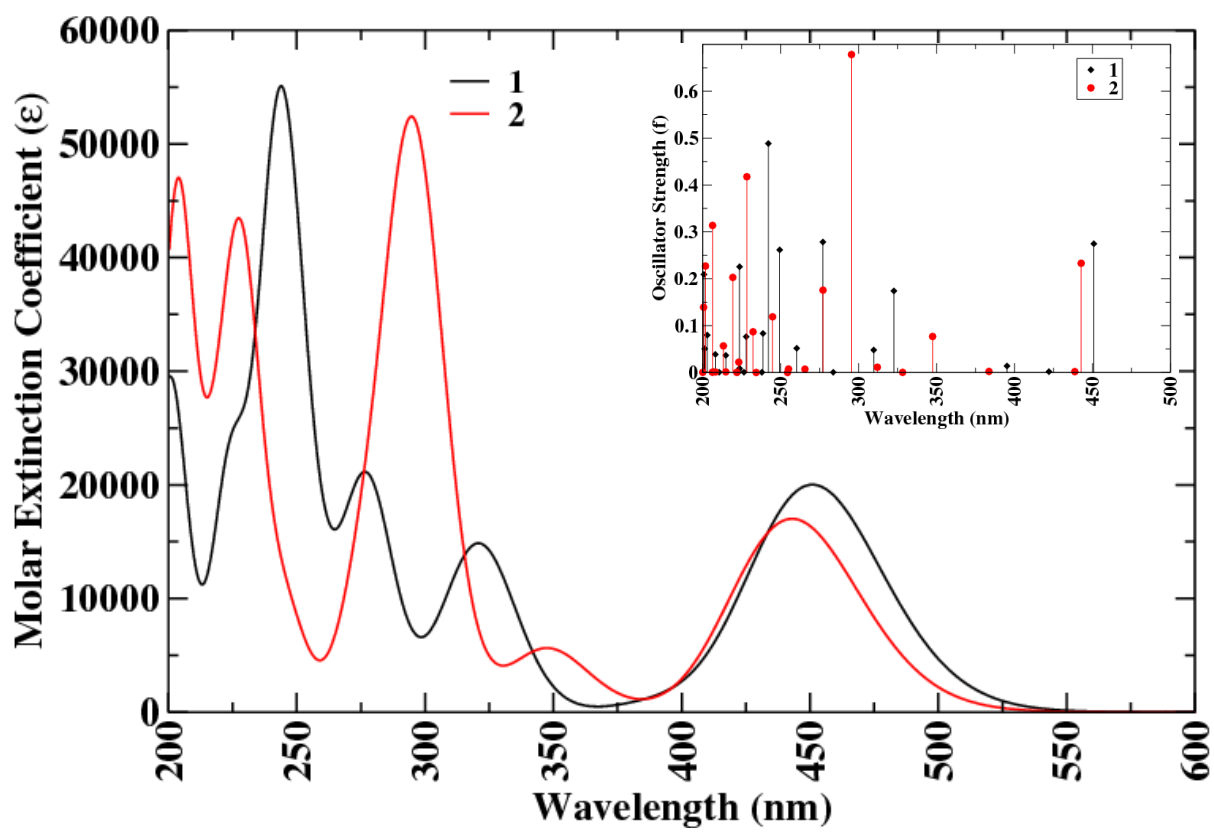

**ESI Fig. S30.** Simulated UV-Visible spectra for **1** and **2** in aqueous solution. Inset: The oscillator strength for singlet-singlet transitions.

**Table S1.** Selected TDDFT singlet transitions depicted in Figure S23 are shown for both **1** and **2**. These TDDFT excitations are calculated from the PCM optimized ground state geometries of **1** and **2**

|            | Energy (eV) | Wavelength (nm) | Oscillator strength | Major contributions                      |
|------------|-------------|-----------------|---------------------|------------------------------------------|
| I          | 2.749       | 451             | 0.2747              | HOMO→LUMO (96%)                          |
| II         | 3.842       | 323             | 0.1739              | HOMO-3→LUMO (91%)<br>HOMO→LUMO+2 (5%)    |
| III        | 4.474       | 277             | 0.2783              | HOMO-1→LUMO+1 (67%)<br>HOMO→LUMO+2 (25%) |
| IV         | 5.121       | 242             | 0.4886              | HOMO-5→LUMO (33%)<br>HOMO→LUMO+2 (35%)   |
| <b>I</b>   | 2.800       | 443             | 0.2330              | HOMO→LUMO (96%)                          |
| <b>II</b>  | 3.568       | 347             | 0.0768              | HOMO→LUMO+1 (83%)<br>HOMO-1→LUMO (12%)   |
| <b>III</b> | 4.196       | 295             | 0.6783              | HOMO-1→LUMO+1 (67%)<br>HOMO-3→LUMO (19%) |
| <b>IV</b>  | 5.429       | 228             | 0.4176              | HOMO→LUMO+3 (38%)<br>HOMO-4→LUMO+1 (15%) |



**Table S2.** B3LYP/6-311+G\*\*/PCM optimized geometries of **1** and **2**.

| No.                | Cartesian coordinates |          |          |          |
|--------------------|-----------------------|----------|----------|----------|
| <b>1</b> ( $S_0$ ) | S                     | 3.94257  | -0.77690 | 0.00000  |
|                    | N                     | 0.16100  | -1.70961 | -0.00022 |
|                    | N                     | 1.46008  | -1.84418 | -0.00026 |
|                    | N                     | 1.72914  | 0.53092  | -0.00009 |
|                    | C                     | -3.85856 | 1.00762  | 0.00024  |
|                    | H                     | -4.30792 | 1.99377  | 0.00031  |
|                    | C                     | -4.64609 | -0.12466 | 0.00025  |
|                    | H                     | -5.72567 | -0.03541 | 0.00034  |
|                    | C                     | -4.04997 | -1.40010 | 0.00016  |
|                    | H                     | -4.67679 | -2.28382 | 0.00018  |
|                    | C                     | -2.67481 | -1.53900 | 0.00005  |
|                    | H                     | -2.22046 | -2.52022 | -0.00002 |
|                    | C                     | -1.85194 | -0.39690 | 0.00002  |
|                    | C                     | -2.44964 | 0.89555  | 0.00013  |
|                    | C                     | -1.61859 | 2.05405  | 0.00011  |
|                    | H                     | -2.09236 | 3.02876  | 0.00017  |
|                    | C                     | -0.24958 | 1.98215  | 0.00005  |
|                    | H                     | 0.34096  | 2.88647  | 0.00003  |
|                    | C                     | 0.35708  | 0.71316  | -0.00003 |
|                    | C                     | -0.40847 | -0.48234 | -0.00009 |
| C                  | 2.21686               | -0.74816 | -0.00019 |          |
| C                  | 3.96499               | 0.95442  | -0.00016 |          |
| H                  | 4.90268               | 1.48696  | -0.00024 |          |
| C                  | 2.72965               | 1.49885  | 0.00000  |          |
| H                  | 2.48122               | 2.54592  | -0.00003 |          |
| <b>1</b> ( $S_1$ ) | S                     | 3.96429  | -0.79013 | -0.00024 |
|                    | N                     | 0.13386  | -1.73936 | -0.00010 |
|                    | N                     | 1.47524  | -1.84263 | -0.00017 |
|                    | N                     | 1.74877  | 0.53778  | -0.00008 |
|                    | C                     | -3.88279 | 0.99947  | 0.00022  |
|                    | H                     | -4.34268 | 1.98073  | 0.00028  |
|                    | C                     | -4.67173 | -0.14179 | 0.00021  |
|                    | H                     | -5.75026 | -0.05421 | 0.00027  |
|                    | C                     | -4.06379 | -1.39657 | 0.00013  |
|                    | H                     | -4.66627 | -2.29605 | 0.00013  |
|                    | C                     | -2.65934 | -1.51138 | 0.00006  |
|                    | H                     | -2.19499 | -2.48761 | 0.00000  |
|                    | C                     | -1.83998 | -0.36529 | 0.00006  |
|                    | C                     | -2.44706 | 0.91595  | 0.00014  |
|                    | C                     | -1.64844 | 2.07827  | 0.00015  |
|                    | H                     | -2.11202 | 3.05585  | 0.00020  |
|                    | C                     | -0.26312 | 1.97250  | 0.00007  |
|                    | H                     | 0.33476  | 2.87367  | 0.00007  |

|                    |   |          |          |          |
|--------------------|---|----------|----------|----------|
|                    | C | 0.34803  | 0.70639  | -0.00001 |
|                    | C | -0.40408 | -0.47962 | -0.00002 |
|                    | C | 2.21621  | -0.76505 | -0.00016 |
|                    | C | 3.99198  | 0.95193  | -0.00018 |
|                    | H | 4.92837  | 1.48535  | -0.00021 |
|                    | C | 2.74990  | 1.48932  | -0.00009 |
|                    | H | 2.51051  | 2.53977  | -0.00003 |
| <b>2</b> ( $S_0$ ) | N | 0.11856  | -1.79086 | -0.00022 |
|                    | N | 1.38752  | -1.98948 | -0.00015 |
|                    | N | 1.82294  | 0.37651  | -0.00005 |
|                    | C | -3.77236 | 1.10739  | -0.00003 |
|                    | H | -4.17940 | 2.11168  | -0.00006 |
|                    | C | -4.60528 | 0.00968  | 0.00006  |
|                    | H | -5.68031 | 0.14321  | 0.00008  |
|                    | C | -4.06243 | -1.29133 | 0.00012  |
|                    | H | -4.72658 | -2.14741 | 0.00021  |
|                    | C | -2.69608 | -1.48882 | 0.00008  |
|                    | H | -2.28346 | -2.48810 | 0.00012  |
|                    | C | -1.82419 | -0.38026 | -0.00001 |
|                    | C | -2.36861 | 0.93527  | -0.00004 |
|                    | C | -1.48418 | 2.04952  | -0.00002 |
|                    | H | -1.90760 | 3.04714  | -0.00006 |
|                    | C | -0.11972 | 1.91003  | 0.00006  |
|                    | H | 0.49478  | 2.79652  | 0.00028  |
|                    | C | 0.43696  | 0.61518  | 0.00000  |
|                    | C | -0.38981 | -0.52496 | -0.00006 |
|                    | C | 2.25710  | -0.93708 | -0.00003 |
|                    | C | 3.63131  | -1.21969 | 0.00012  |
|                    | H | 3.91621  | -2.26250 | 0.00012  |
|                    | C | 4.54938  | -0.19782 | 0.00020  |
|                    | H | 5.61050  | -0.40858 | 0.00041  |
|                    | C | 4.08740  | 1.13011  | 0.00001  |
|                    | H | 4.77633  | 1.96335  | -0.00006 |
|                    | C | 2.74599  | 1.39468  | -0.00011 |
|                    | H | 2.36354  | 2.40003  | -0.00029 |
| <b>2</b> ( $S_1$ ) | N | 0.08463  | -1.81432 | 0.00005  |
|                    | N | 1.40169  | -1.98692 | 0.00012  |
|                    | N | 1.84004  | 0.38100  | -0.00000 |
|                    | C | -3.79046 | 1.09932  | 0.00003  |
|                    | H | -4.21074 | 2.09805  | 0.00004  |
|                    | C | -4.63089 | -0.01122 | 0.00001  |
|                    | H | -5.70426 | 0.12555  | 0.00000  |
|                    | C | -4.08136 | -1.28958 | -0.00001 |
|                    | H | -4.72203 | -2.16200 | -0.00002 |
|                    | C | -2.68350 | -1.46241 | -0.00000 |
|                    | H | -2.25798 | -2.45601 | -0.00001 |

|   |          |          |          |
|---|----------|----------|----------|
| C | -1.81419 | -0.34828 | 0.00002  |
| C | -2.36440 | 0.95545  | 0.00003  |
| C | -1.50975 | 2.07623  | 0.00005  |
| H | -1.92377 | 3.07588  | 0.00008  |
| C | -0.13057 | 1.90240  | 0.00005  |
| H | 0.49192  | 2.78493  | 0.00009  |
| C | 0.42822  | 0.61432  | 0.00002  |
| C | -0.38856 | -0.52664 | 0.00002  |
| C | 2.25138  | -0.95784 | 0.00010  |
| C | 3.64551  | -1.22577 | 0.00015  |
| H | 3.93825  | -2.26665 | 0.00025  |
| C | 4.55962  | -0.20592 | 0.00007  |
| H | 5.62032  | -0.42194 | 0.00012  |
| C | 4.10692  | 1.13366  | -0.00007 |
| H | 4.79744  | 1.96470  | -0.00016 |
| C | 2.76223  | 1.38966  | -0.00011 |
| H | 2.38280  | 2.39775  | -0.00022 |
